# Supplementary material for: Mining Indonesian Microbial Biodiversity for Novel Natural Compounds by a Combined Genome Mining and Molecular Networking Approach
Source: MDPI journal article supplement (doi:10.3390/md19060316), 2021-05-28
Supplement: s1 [file s1]

## Supplementary

### **Mining Indonesian microbial biodiversity for novel natural compounds by a combinatorial genome mining and molecular networking approach**

Ira Handayani <sup>1,2,a</sup>, Hamada Saad <sup>3,8,a</sup>, Shanti Ratnakomala <sup>2</sup>, Puspita Lisdiyanti <sup>2</sup>, Wien Kusharyoto <sup>2</sup>, Janina Krause<sup>1</sup>, Wolfgang Wohlleben<sup>1</sup>, Andreas Kulik<sup>1</sup>, Saefuddin Aziz <sup>3</sup>, Harald Gross <sup>3</sup>, Athina Gavriilidou <sup>4</sup>, Nadine Ziemert <sup>4,5</sup>, and Yvonne Mast<sup>1,5,6,7,\*</sup>

<sup>1</sup> Department of Microbiology/Biotechnology, Interfaculty Institute of Microbiology and Infection Medicine, Tübingen (IMIT), Cluster of Excellence 'Controlling Microbes to Fight Infections', University of Tübingen, Auf der Morgenstelle 28, 72076 Tübingen, Germany; e-mail@e-mail.com

<sup>2</sup> Research Center for Biotechnology, Indonesian Institute of Sciences (LIPI), Jl. Raya Jakarta-Bogor KM.46, Cibinong, West Java 16911, Indonesia; p2biotek@bioteknologi.lipi.go.id.

<sup>3</sup> Department of Pharmaceutical Biology, Institute of Pharmaceutical Sciences, University of Tübingen, Auf der Morgenstelle 8, 72076 Tübingen, Germany; e-mail@e-mail.com

<sup>4</sup> Applied Natural Products Genome Mining, Interfaculty Institute of Microbiology and Infection Medicine Tübingen (IMIT), Cluster of Excellence 'Controlling Microbes to Fight Infections', University of Tübingen, Auf der Morgenstelle 28, 72076 Tübingen, Germany.; e-mail@e-mail.com

<sup>5</sup> German Center for Infection Research (DZIF), Partner Site Tübingen, Tübingen, Germany

<sup>6</sup> Department of Bioresources for Bioeconomy and Health Research, Leibniz Institute DSMZ – German Collection of Microorganisms and Cell Cultures, Inhoffenstraße 7B, 38124 Braunschweig, Germany; e-mail@e-mail.com

<sup>7</sup> Department of Microbiology, Technical University of Braunschweig, Braunschweig, Germany; e-mail@e-mail.com

<sup>8</sup> Department of Phytochemistry and Plant Systematics, Division of Pharmaceutical Industries, National Research Centre, Dokki, Cairo (Egypt)

<sup>a</sup> Ira Handayani and Hamada Saad contributed equally to this work

<sup>\*</sup> Correspondence: yvonne.mast@dsmz.de; Tel.: +49-531-2616-358

## Preparation of test plates for agar diffusion tests

### A. Preparation of *Bacillus subtilis* test plates

*B. subtilis* is grown for 4 to 7 days at a temperature of 29°C in sporulation medium (FeCl<sub>3</sub> x 6H<sub>2</sub>O 1 mg, MnCl<sub>2</sub> x 2xH<sub>2</sub>O 14.5 mg, NH<sub>4</sub>Cl 540 mg, Na<sub>2</sub>SO<sub>4</sub> 105 mg, KH<sub>2</sub>PO<sub>4</sub> 87 mg, CaCl<sub>2</sub> 194.7 mg, NH<sub>4</sub>NO<sub>3</sub>, MgCl<sub>2</sub> x 6H<sub>2</sub>O 8.3 mg, glucose 2 g, Na-L-glutamate x H<sub>2</sub>O 1.9 g, pH7.1). The *B. subtilis* culture was harvested (10 min, 5000 rpm, 4 ° C) and twice washed with 20 mL of H<sub>2</sub>O<sub>deion.</sub>. The washed pellets were dissolved with 15 mL H<sub>2</sub>O<sub>deion.</sub> and heated for 30 minutes at 70 °C to kill remaining vegetative cells. The spore suspension can be stored for a long time at a temperature not exceeding 4 ° C. For *B. subtilis* test plates, 10 mL/L of the spore suspension were poured into *B. subtilis* test agar (KH<sub>2</sub>PO<sub>4</sub> 3g, K<sub>2</sub>HPO<sub>4</sub> 7g, tri-Na citrate.2H<sub>2</sub>O 0.5 g, MgSO<sub>4</sub> x 7H<sub>2</sub>O 0.1 g, (NH<sub>4</sub>)<sub>2</sub>SO<sub>4</sub> 1g). Plates were incubated overnight at 37 °C

### B. Preparation of *M. luteus* and *P. fluorescens* test plates

Bioassays test plates for *M. luteus* and *P. fluorescens* were prepared by spread *M. luteus* or *P. fluorescens* cells evenly over YM agar plates surface. The plates were used directly for inhibition zone tests. Plates were incubated overnight at 28°C.

### C. Preparation of *E. coli* and *S. carnosus* test plates

In liquid LB agar, cells of an overnight culture of *E. coli* or *S. carnosus* were poured in a ratio of 1: 100 and pipetted into petri dishes. For bioassays, the plates were incubated overnight at 37°C.

## Polyphasic characteristics of the most closely related type strains of each clade A-D shown in Figure 3

Clade A – *Streptomyces luteus* (according to Luo et al., 2017 [1]):

The strain was aerobic, Gram-stain-positive, with an optimum NaCl concentration for growth of 5% (w/v). The isolate formed white aerial mycelium that was long filamentous with few branches; the substrate mycelium possessed long, smooth-surfaced spore chains bearing smooth spores and produced a yellow diffusible pigment. The strain contained iso-C16:0, anteiso-C15:0, anteiso-C17:0 and C16:0 as major

cellular fatty acids. The predominant menaquinones of the strain were MK-9(H6), MK-9(H4) and MK-9(H10). The whole-cell sugar pattern contained glucose and ribose. The polar lipid pattern of the strain consisted of phosphatidylethanolamine, diphosphatidylglycerol, phosphatidylinositol, phosphatidylglycerol and phosphatidylinositolmannosides.

Clade B – *Streptomyces capillispiralis* (according to Mertz and Higgins et al., 1982 [2]):

*Streptomyces capillispiralis* produces a cephalosporin C-4 carboxymethyl esterase. The key characteristics of this species are gray spore mass color, spiral spore chains, and hairy spores.

Clade C – *Streptomyces bungoensis* (according to Eguchi et al., 1993 [3]):

*Streptomyces bungoensis* forms gray aerial mass, spiral spore chains, and a spiny spore surface; forms a melanoid pigment on tyrosine agar, on peptone-yeast extract-iron agar, and in tryptone-yeast extract broth; and has cell wall chemotype I.

Clade D – *Streptomyces spongiicola* (according to Huang et al., 2016 [4]):

The major menaquinones were MK-9 (H6) (65.6 %), MK-9 (H4) (23.8 %) and MK-9 (H8) (10.6 %). The predominant fatty acids were anteiso-C15 : 0 (25.5 %), iso-C16 : 0 (19.5 %) and iso-C15 : 0 (15.4 %). The predominant phospholipids were diphosphatidylglycerol, phosphatidylglycerol and phosphatidylethanolamine. In addition, four unidentified phospholipids were found. The G+C content of the genomic DNA was 69.8mol%.

## Figures and Tables

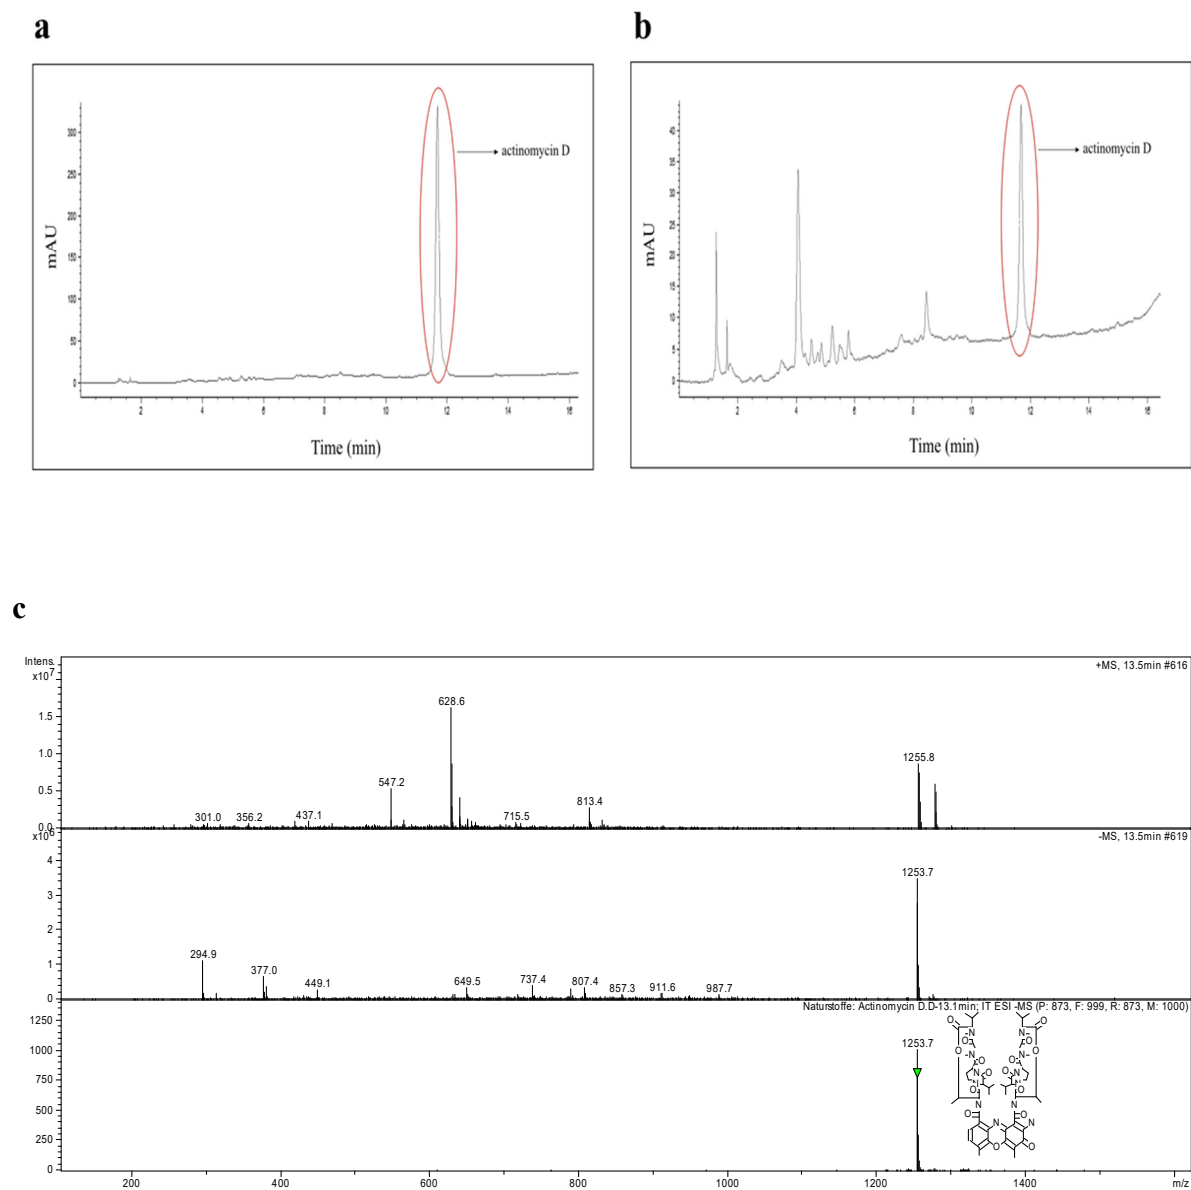

**Figure S1.** Actinomycin D production in DHE 6-7 (a) and DHE 5-1 (b). Peaks in HPLC representing actinomycin are marked with red colour. Mass spectra of actinomycin D detected in DHE 6-7 (c).

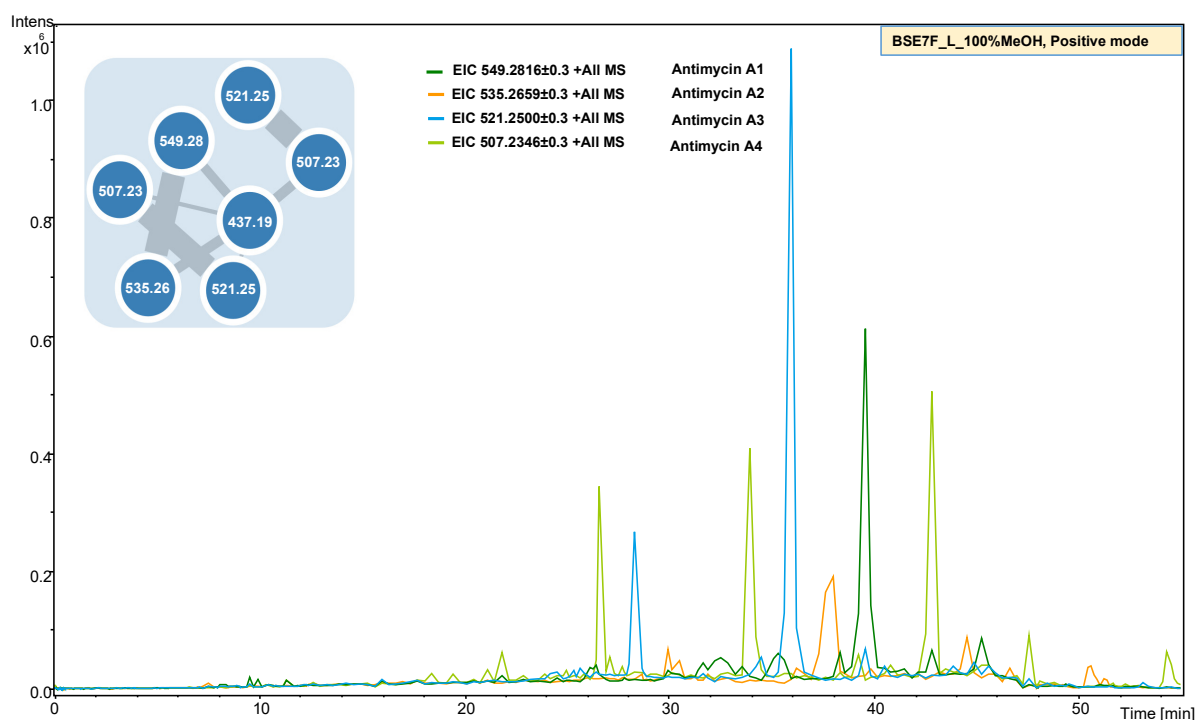

**Figure S2.** Positive extracted ion chromatograms (EICs), ions cluster and predicted molecular formula of antimycins.

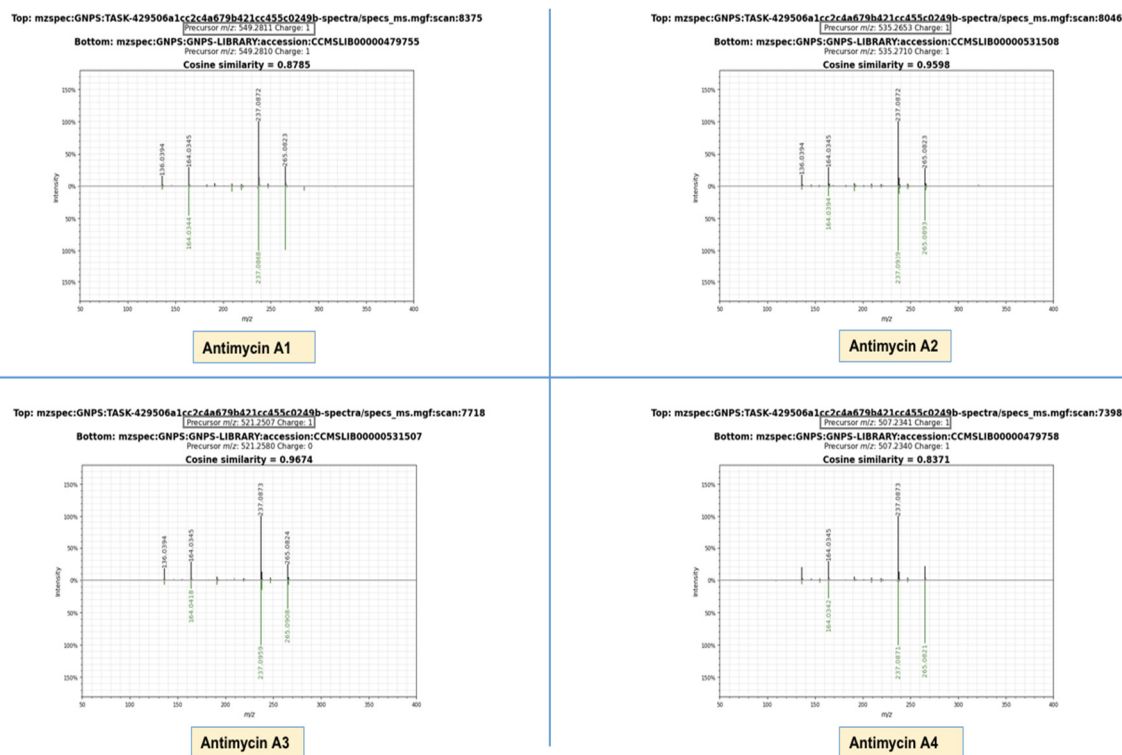

**Figure S3.** GNPS spectral libraries hits of antimycins.

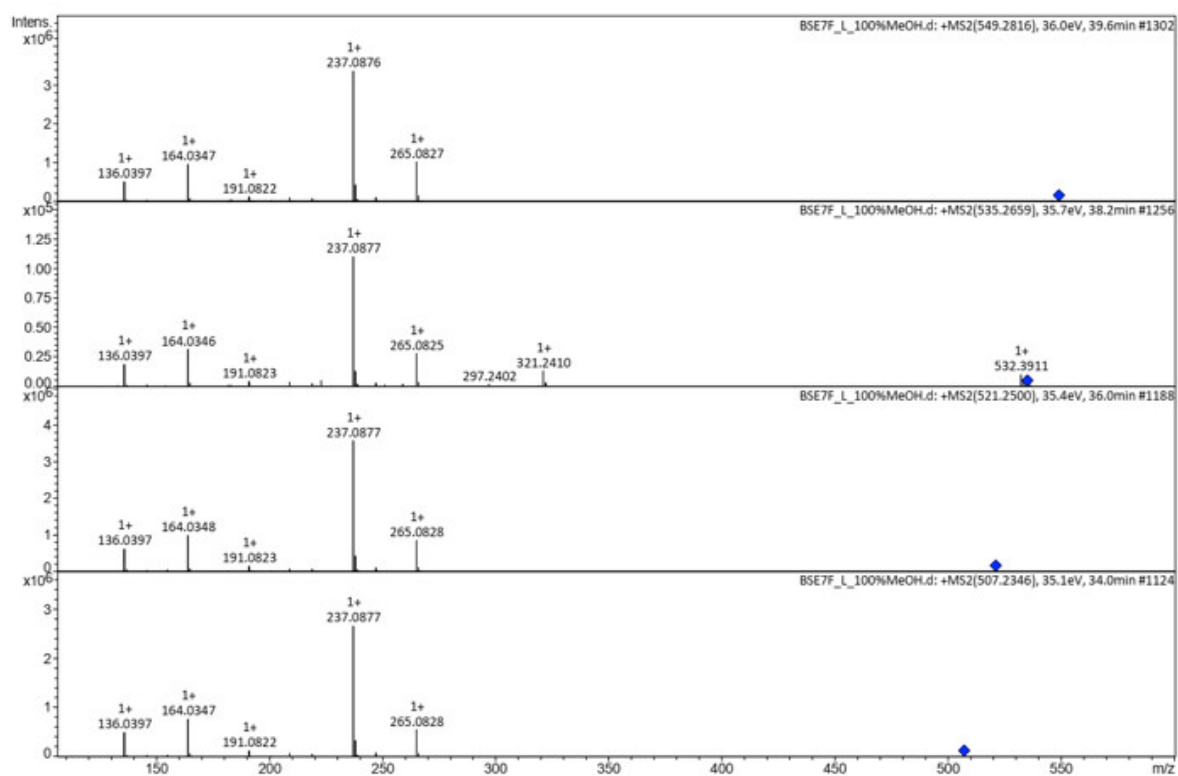

**Figure S4.** Positive MS<sup>2</sup> spectra of the detected antimycins from isolate BSE 7F.

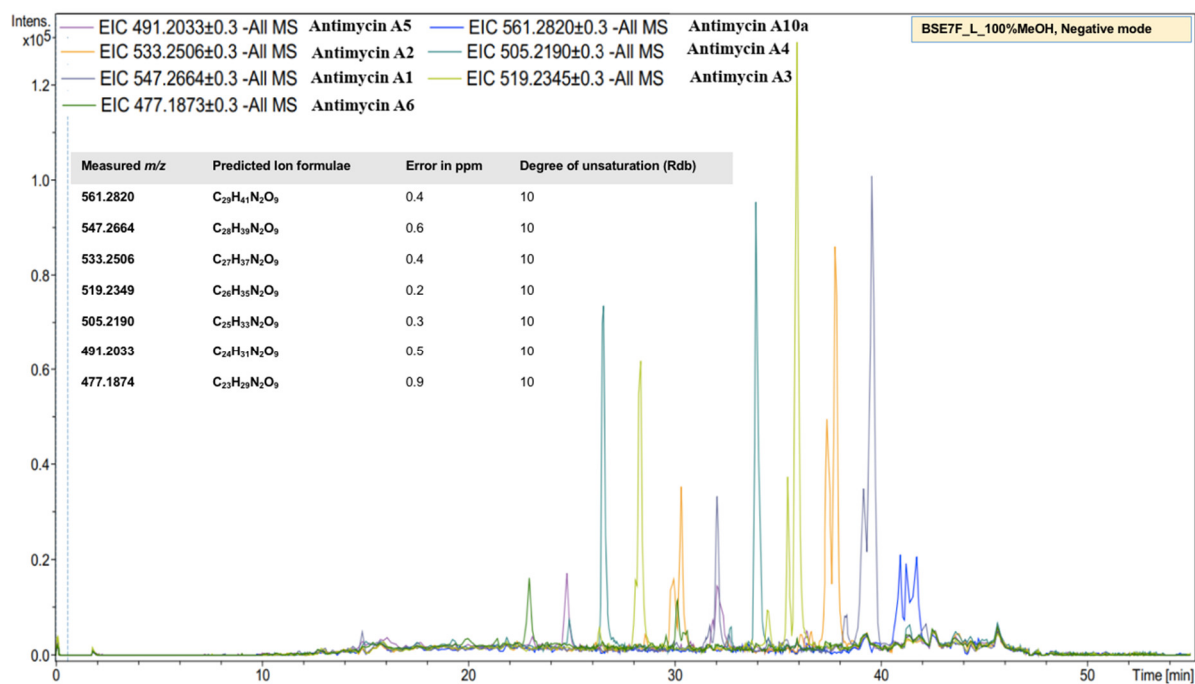

**Figure S5.** Negative EICs and predicted molecular formulae of antimycins.

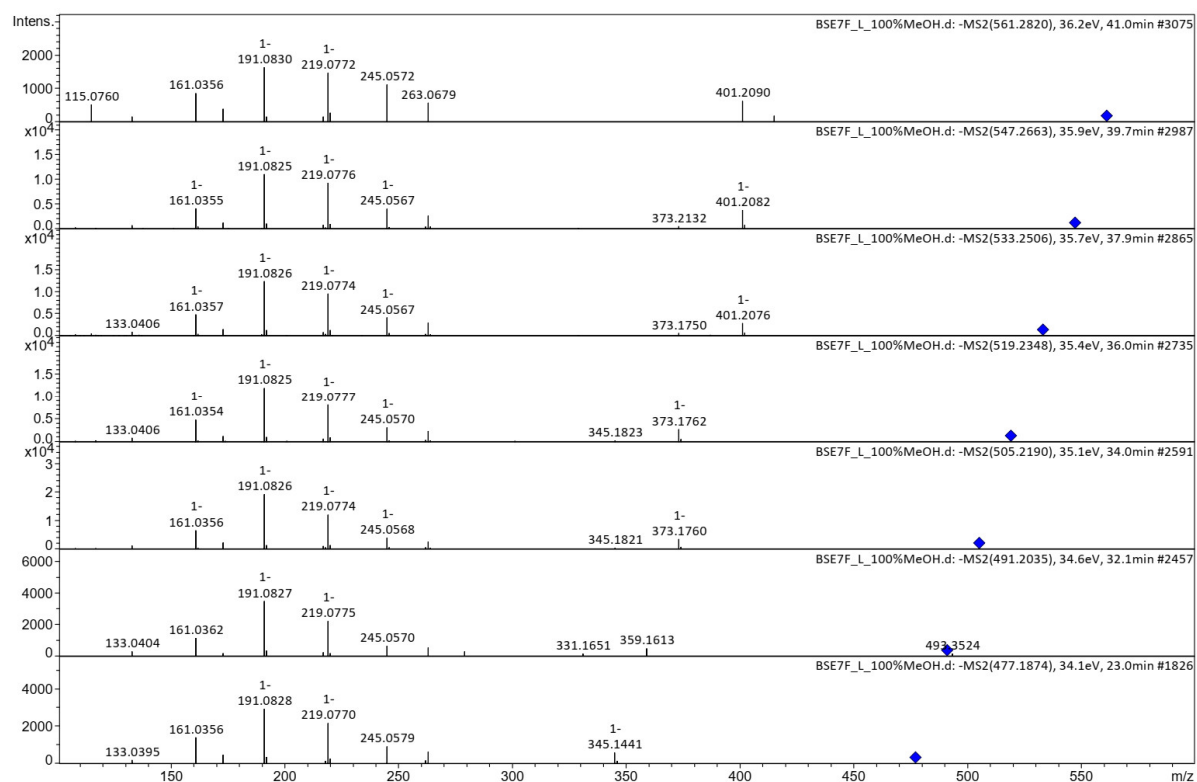

**Figure S6.** Negative MS<sup>2</sup> spectra of the detected antimycins from isolate BSE 7F.

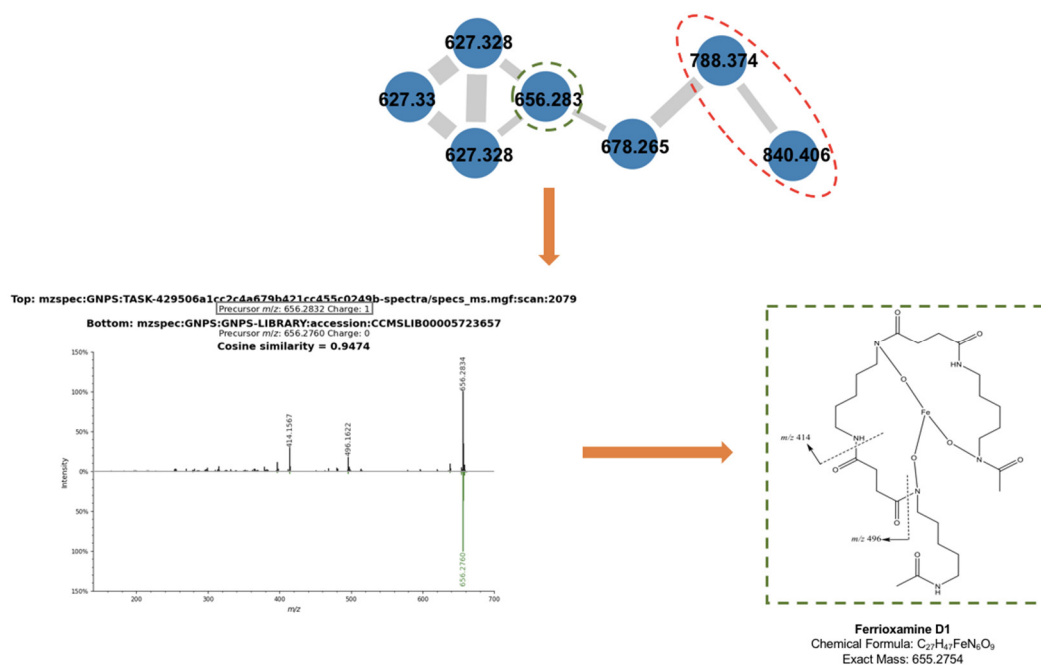

**Figure S7.** Ions cluster of ferrioxamines and GNPS spectral libraries hit of ferrioxamine D1.

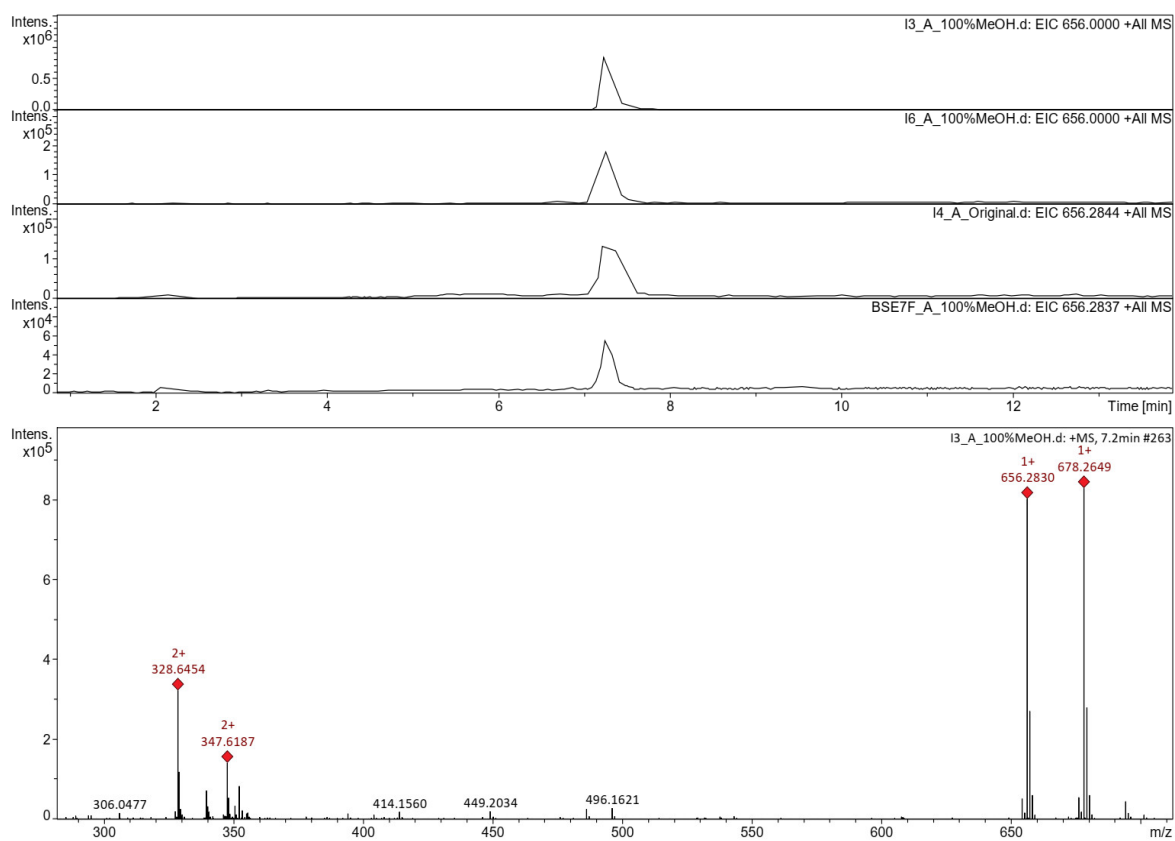

**Figure S8.** Positive EICs and molecular formula prediction of ferrioxamine D1.



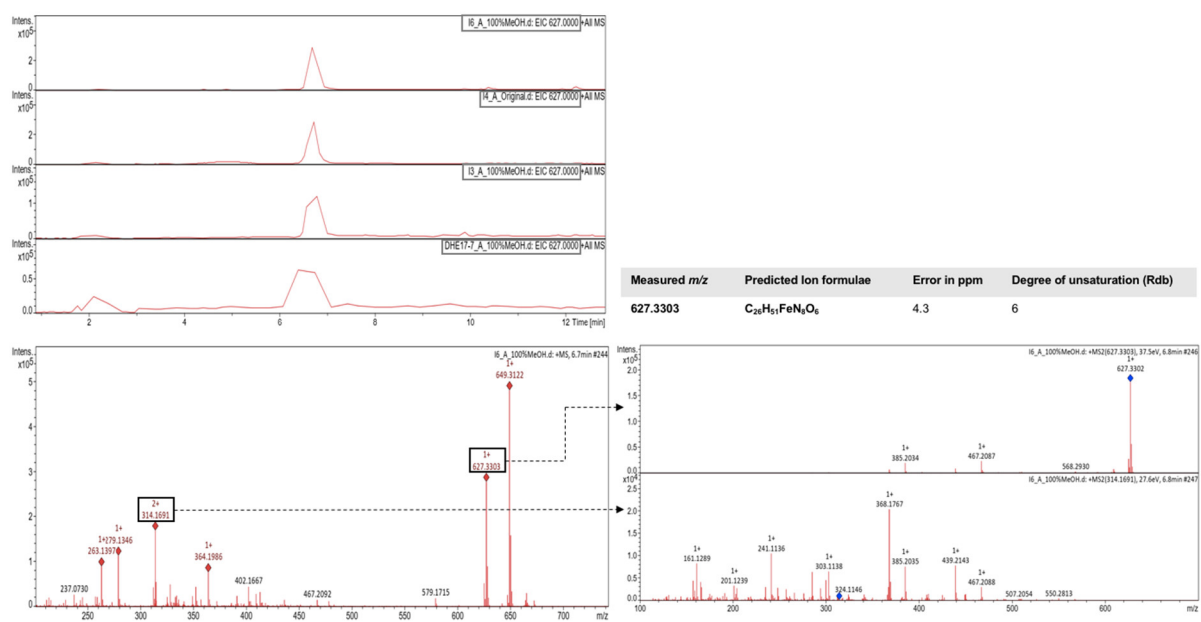

**Figure S9.** Positive EICs, molecular formula prediction and MS<sup>2</sup> of an unknown ferrioxamine.

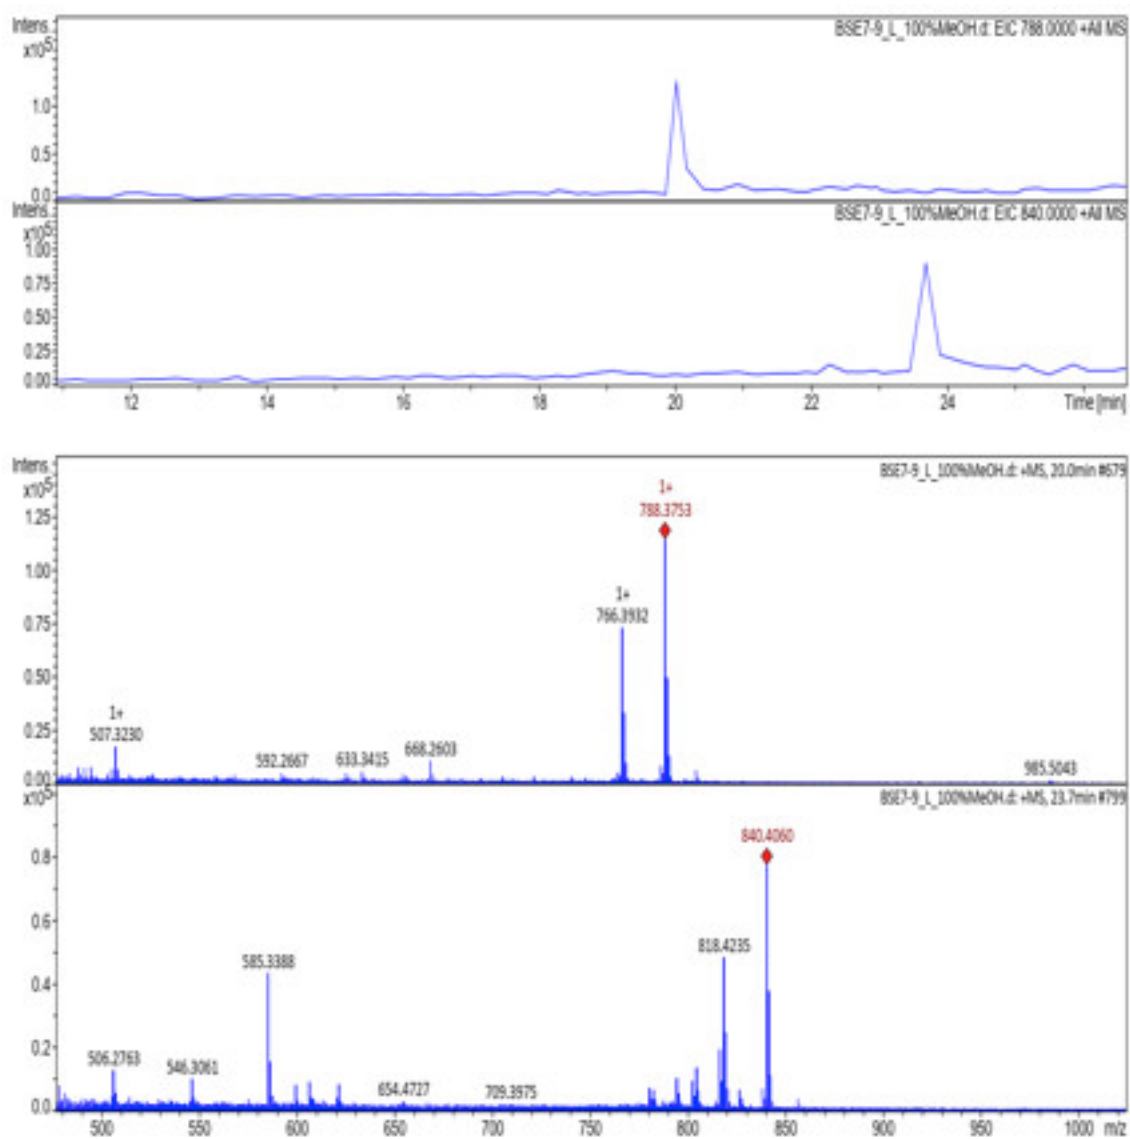

**Figure S10.** Positive EICs and MS<sup>1</sup> of unknown amphiphilic ferrioxamines.

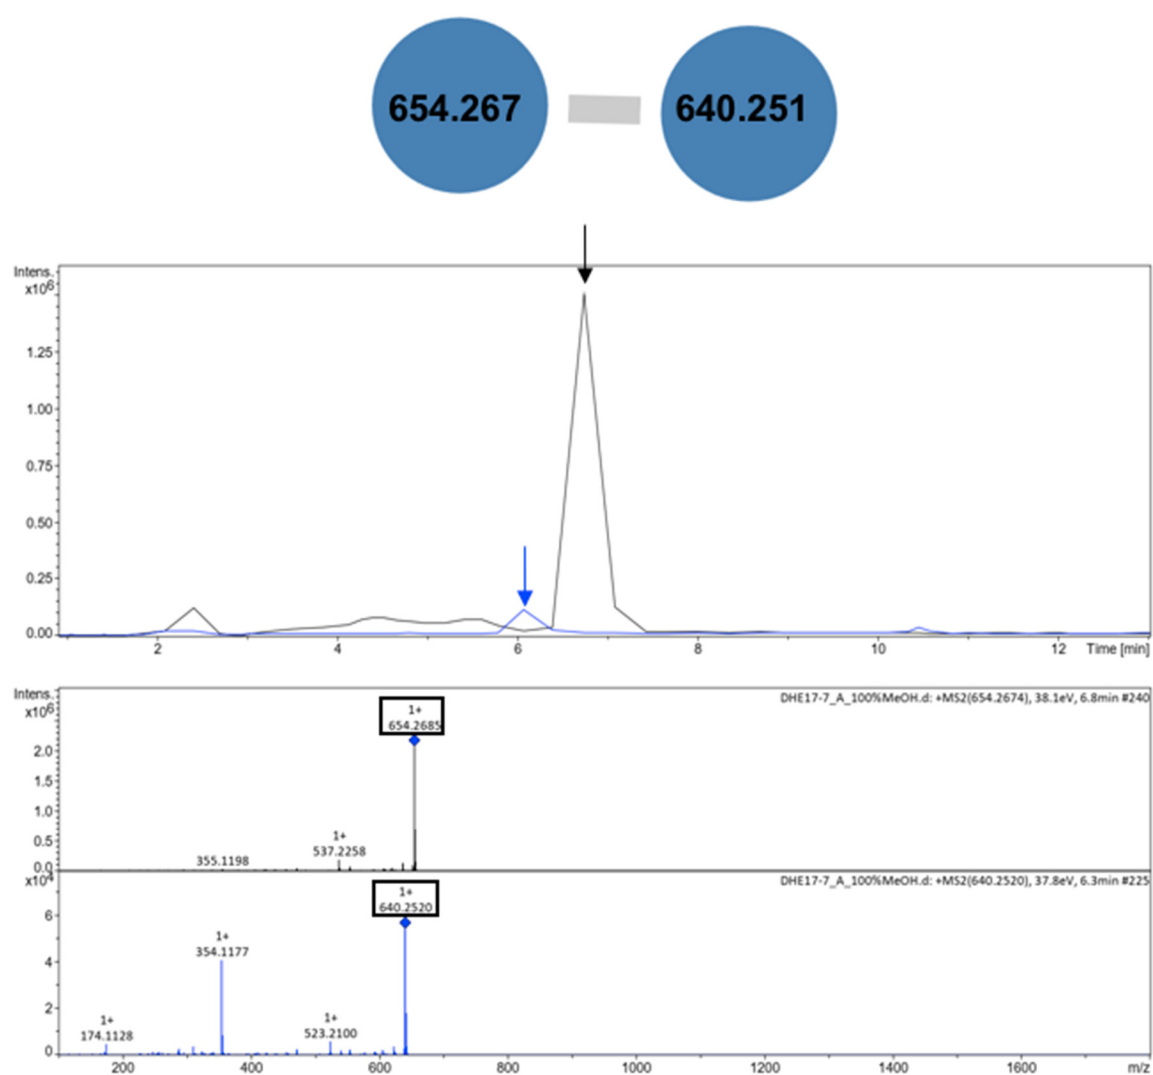

**Figure S11.** Positive EICs and MS<sup>2</sup> of DHE 17-7 ferrioxamines.

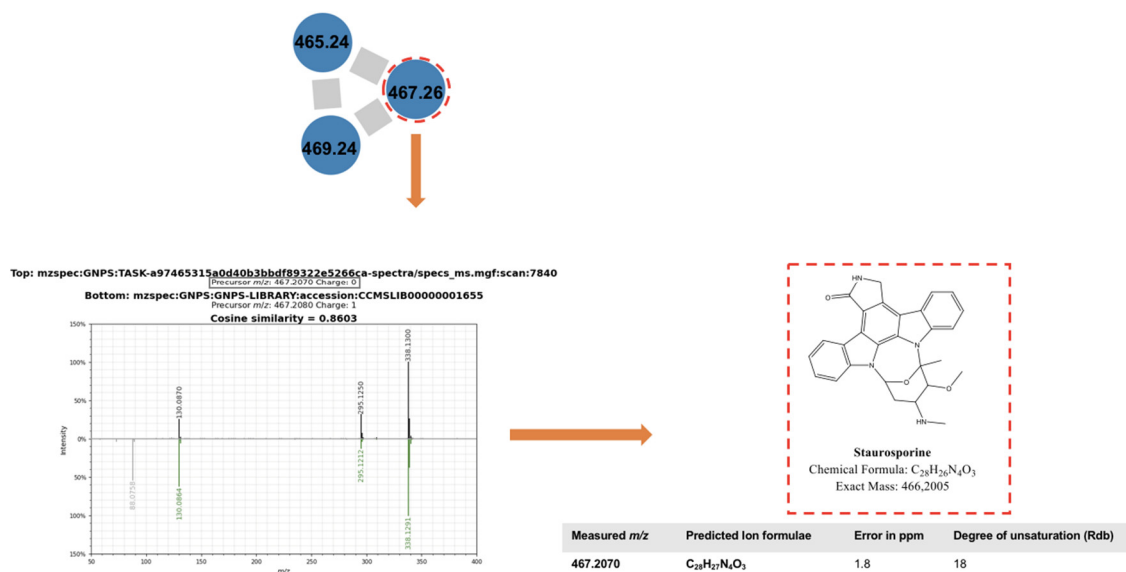

**Figure S12.** Ions cluster of staurosporines and GNPS spectral libraries hit of staurosporine.

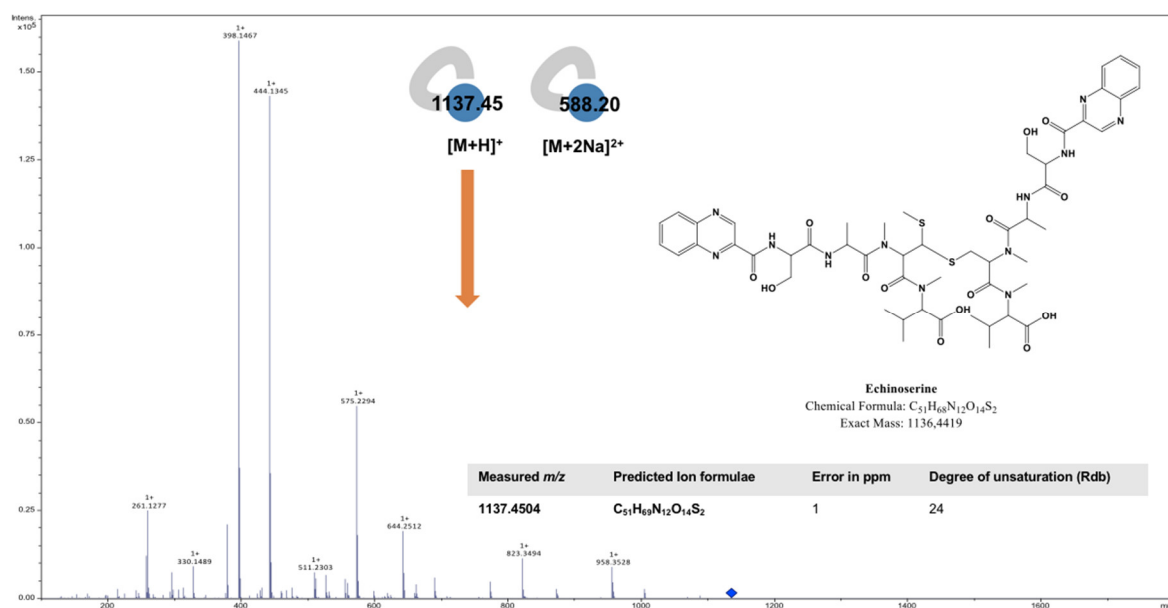

**Figure S13.** Ions clusters of echinoserine.

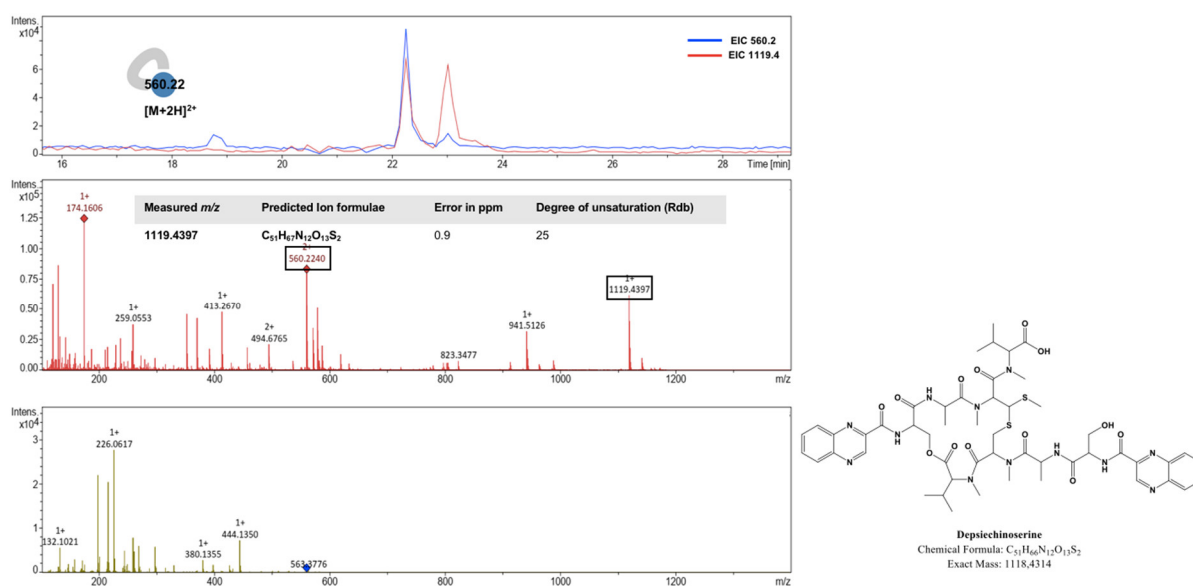

**Figure S14.** Ion singlet of depsiechinoserine, positive EICs and MS<sup>2</sup> of depsiechinoserine.

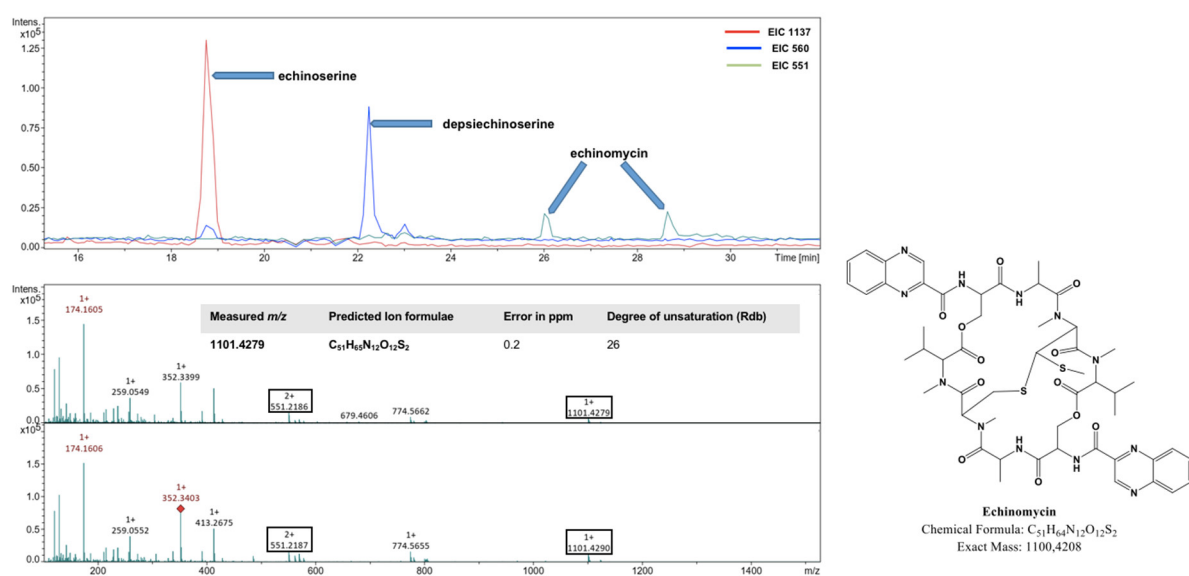

**Figure S15.** Positive EICs and MS<sup>1</sup> of echinomycin.

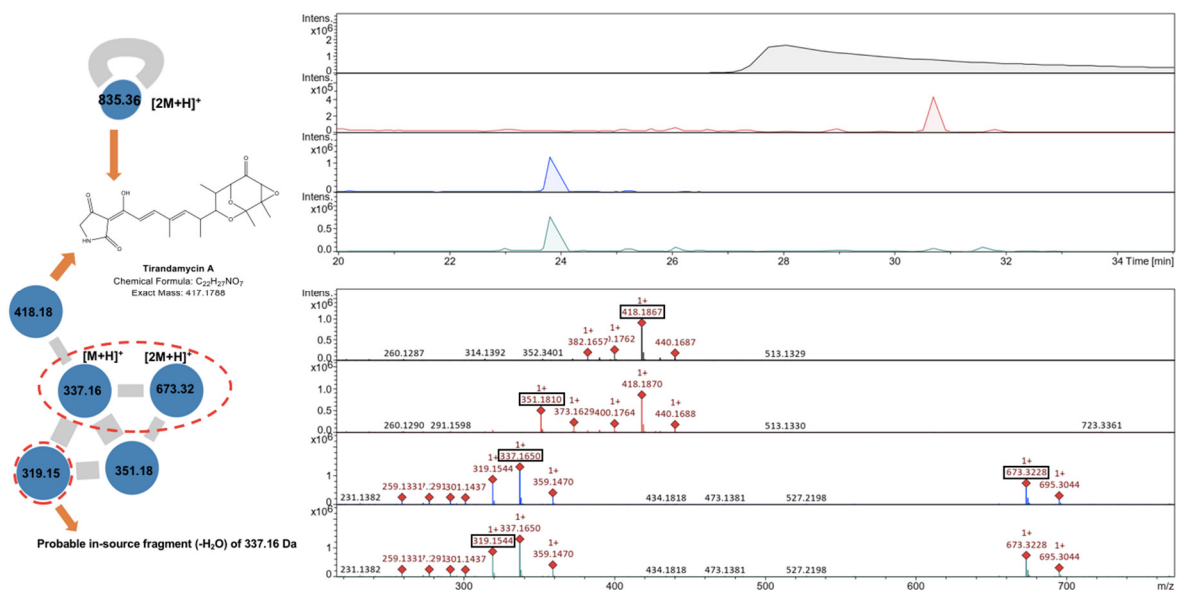

**Figure S16.** Ions cluster, Positive EICs and MS<sup>1</sup> of tirandamycin A in addition to its congeners.

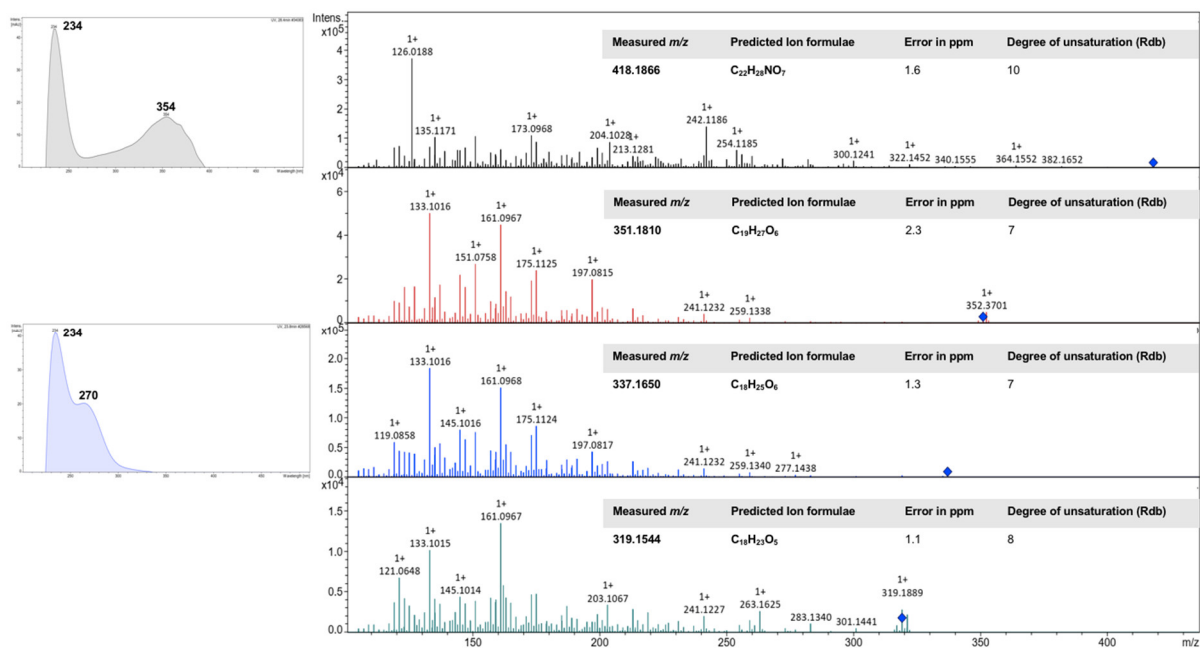

**Figure S17.** UV absorbance, and MS<sup>2</sup> of tirandamycin A in addition to its congeners.

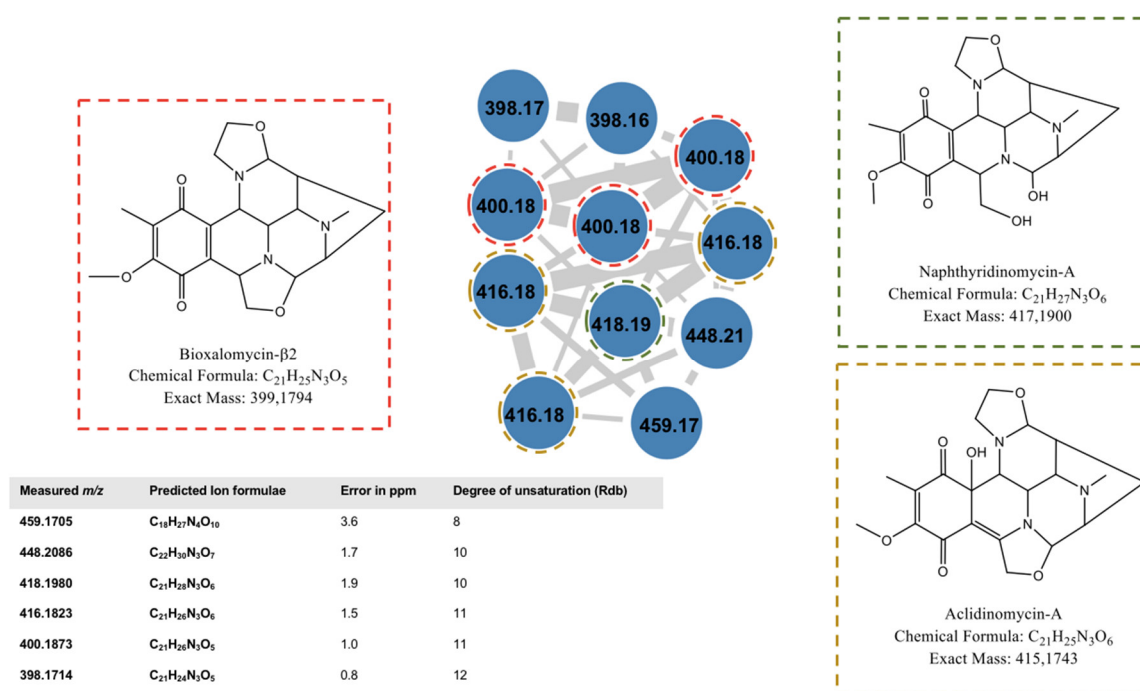

**Figure S18.** Ion cluster of naphthyridinomycins and their predicted molecular formula (MF).

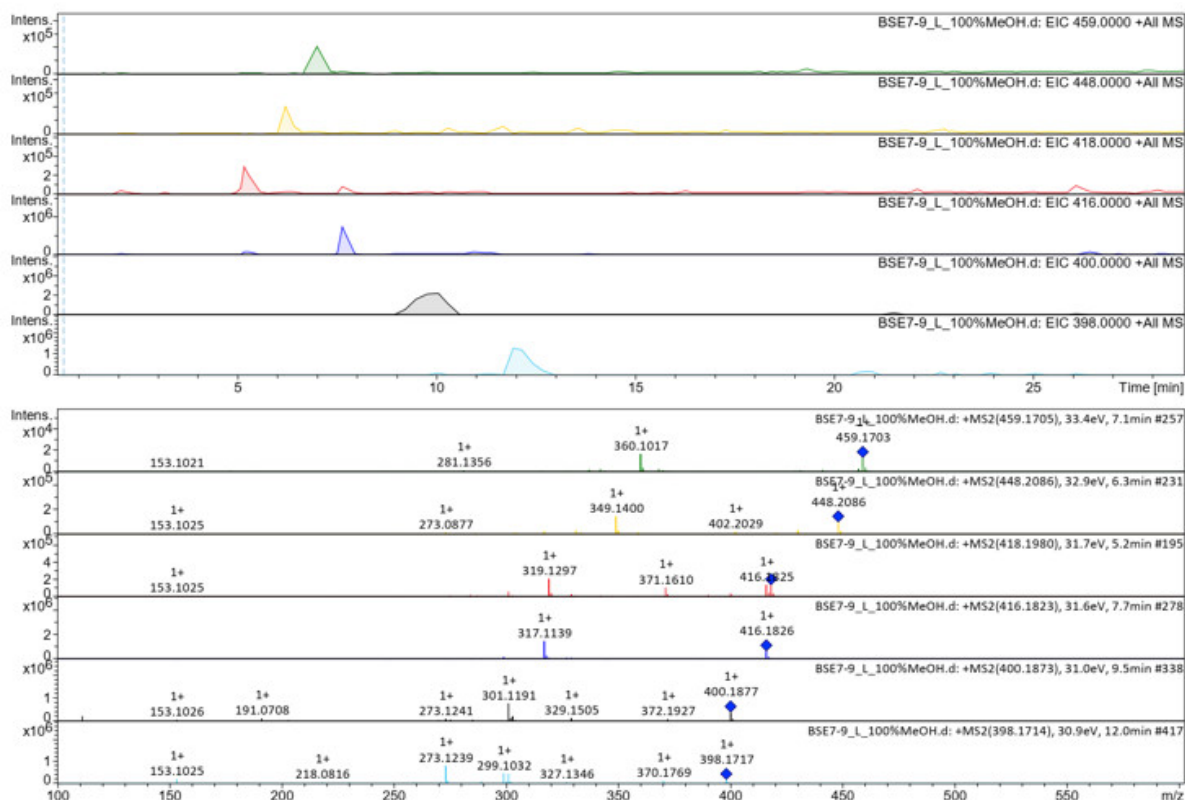

**Figure S19.** Positive EICs and MS<sup>2</sup> of naphthyridinomycin and their related entities from isolate BSE 7-9.

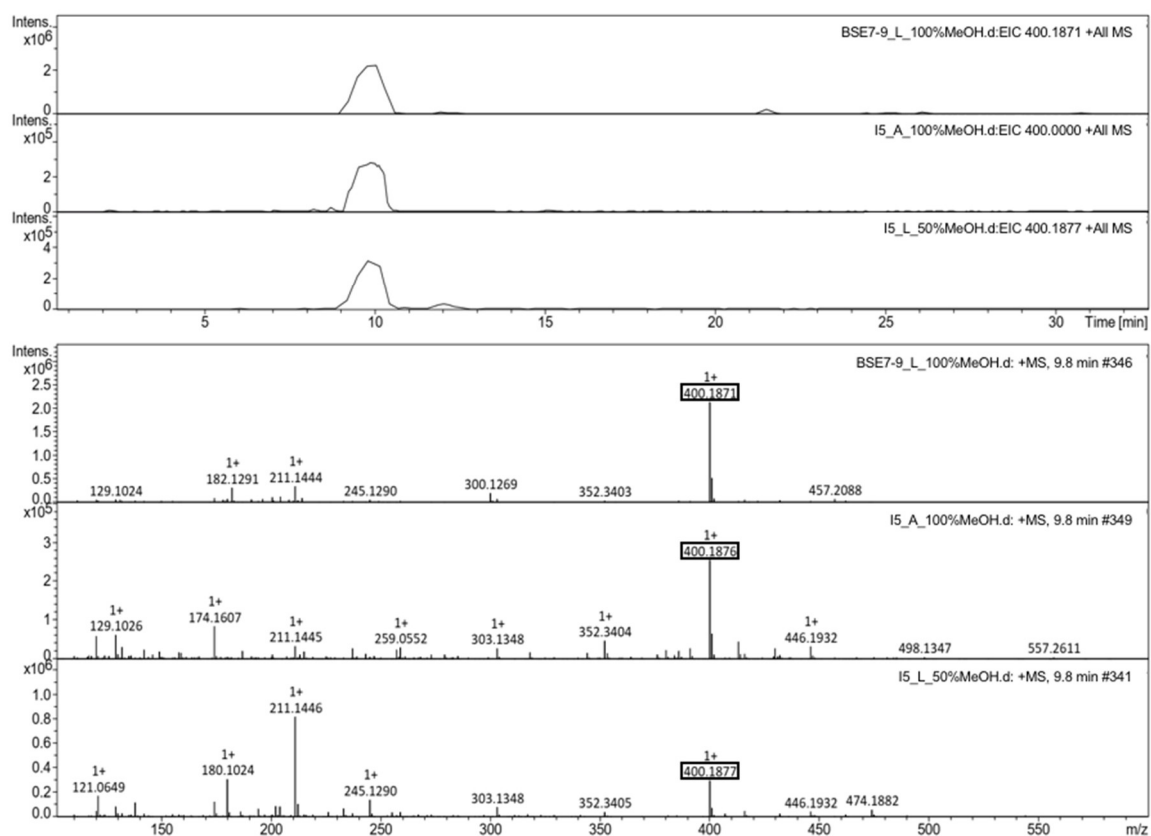

**Figure S20.** Positive EICs and MS<sup>1</sup> of naphthyridinomycin from isolates BSE 7-9 and I5.

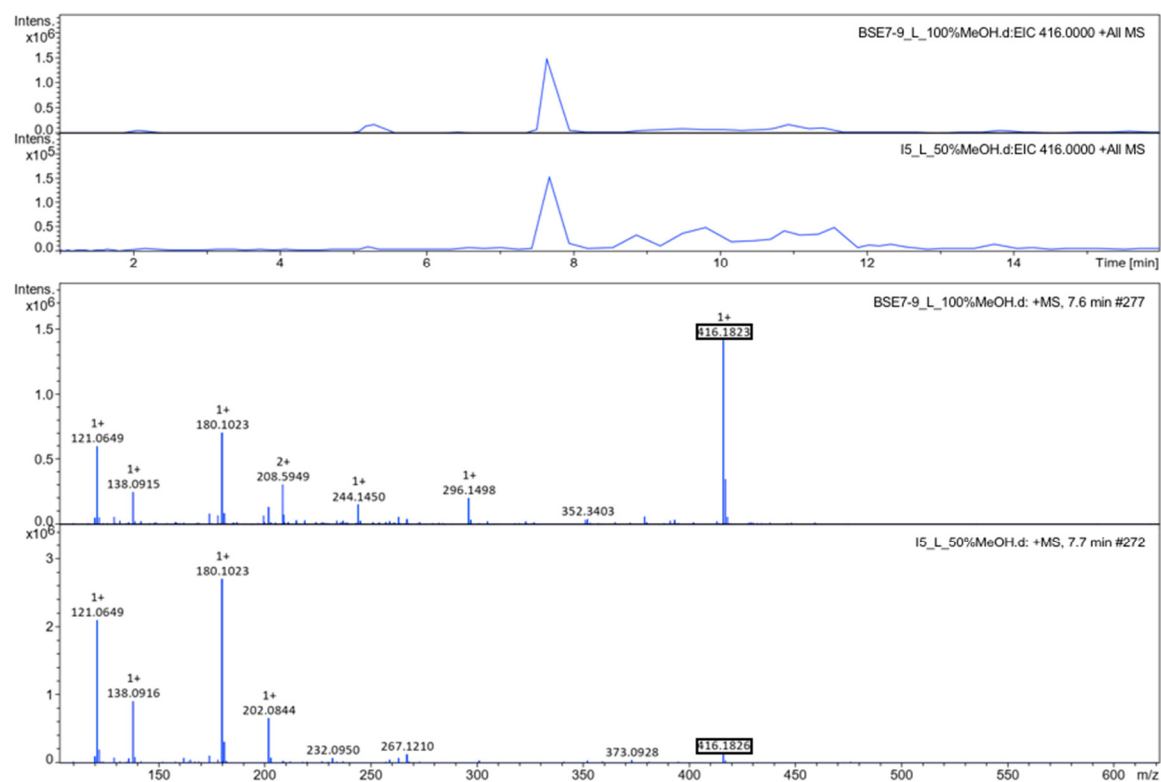

**Figure S21.** Positive EICs and MS<sup>1</sup> of acridinomycin A from isolates BSE 7-9 and I5.



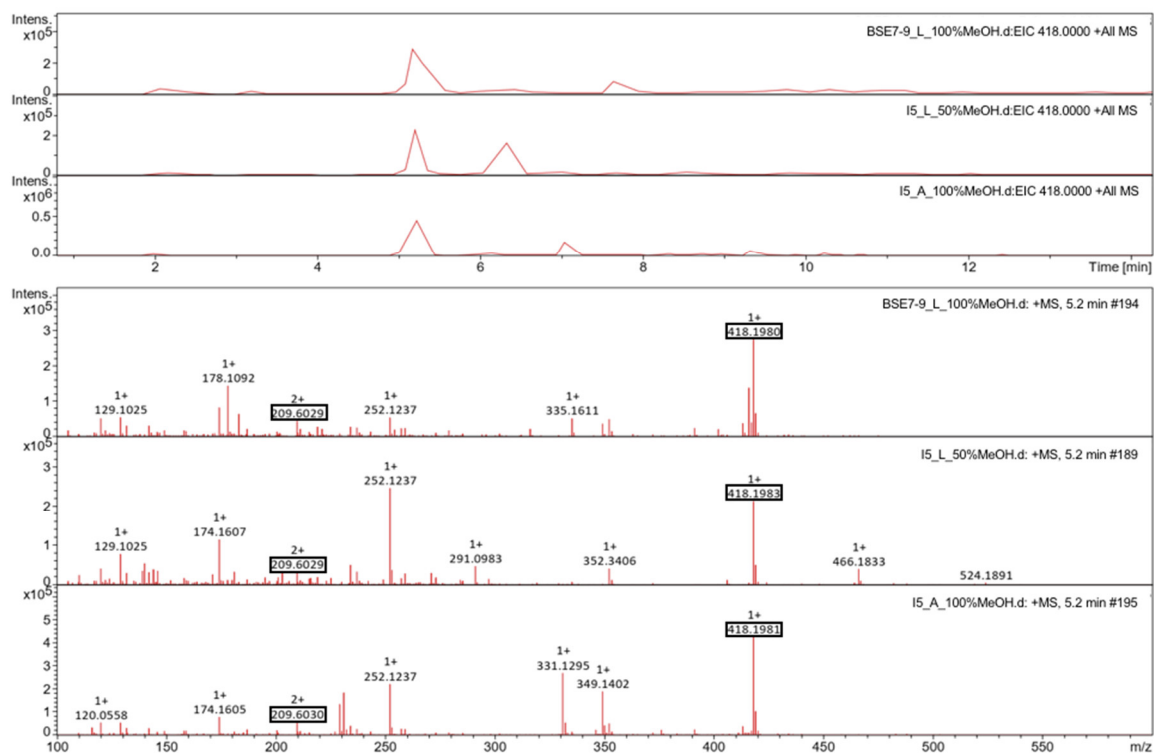

**Figure S22.** Positive EICs and MS<sup>1</sup> of bioxalomycin-β<sub>2</sub> from isolates BSE 7-9 and I5.

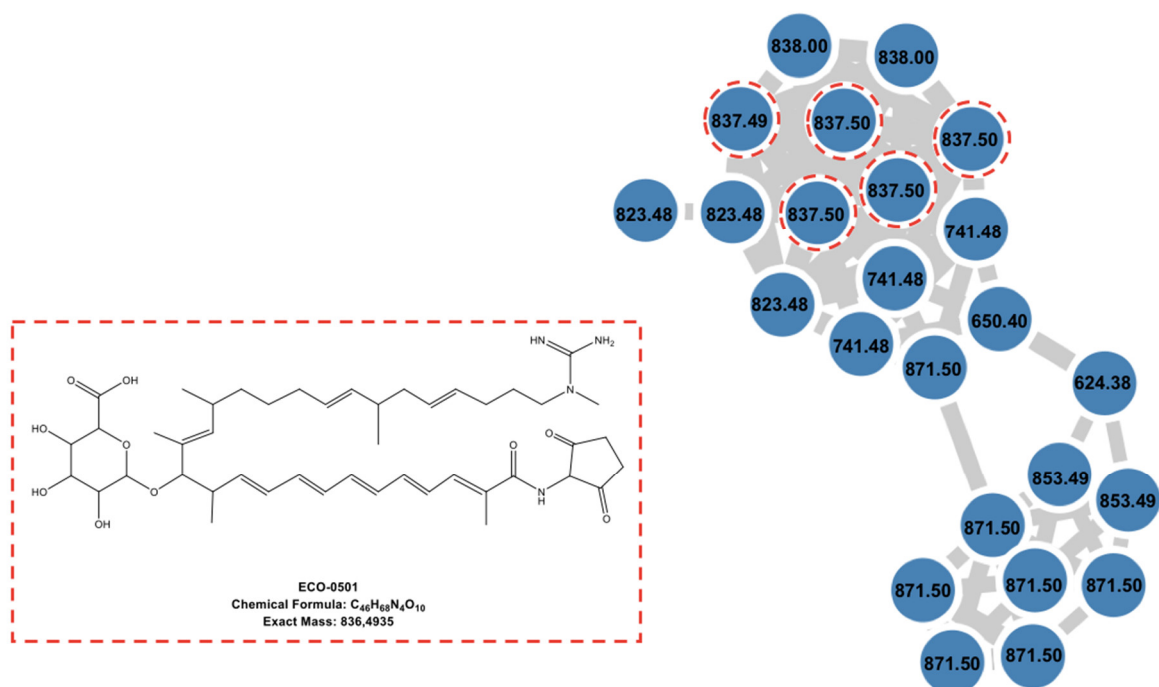

**Figure S23.** Ions cluster of ECO-0501 and its related congeners from isolate DHE 17-7.

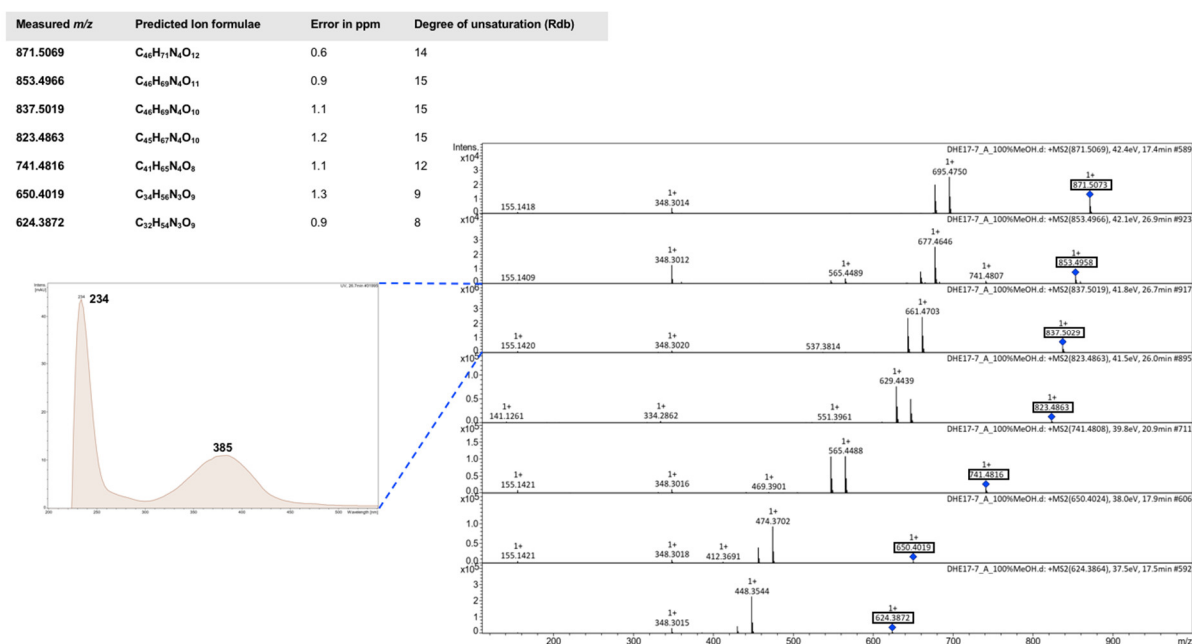

**Figure S24.** UV absorbance, MS2 of ECO-0501 and its related congeners from isolate DHE 17-7.

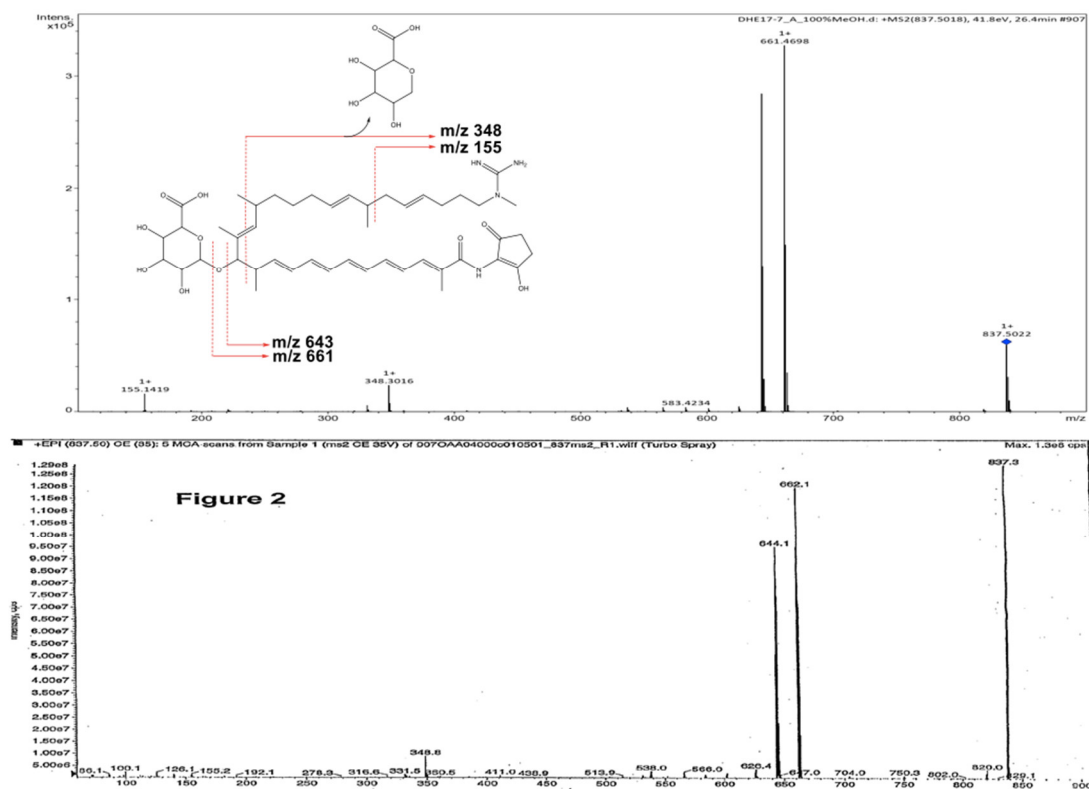

**Figure S25.** Comparative positive MS<sup>2</sup> of ECO-0501 from isolate DHE 17-7 and its reported version from *Amycolatopsis orientalis*.

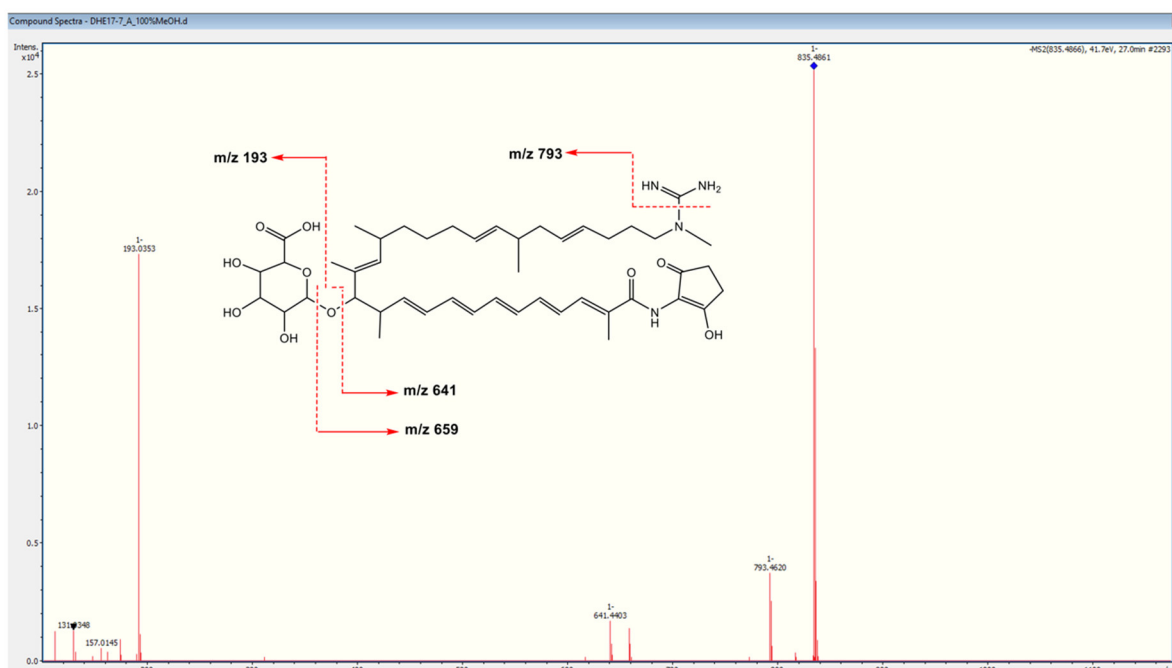

**Figure S26.** Negative MS2 of ECO-0501 from isolate DHE 17-7 and its proposed fragmentation scheme.

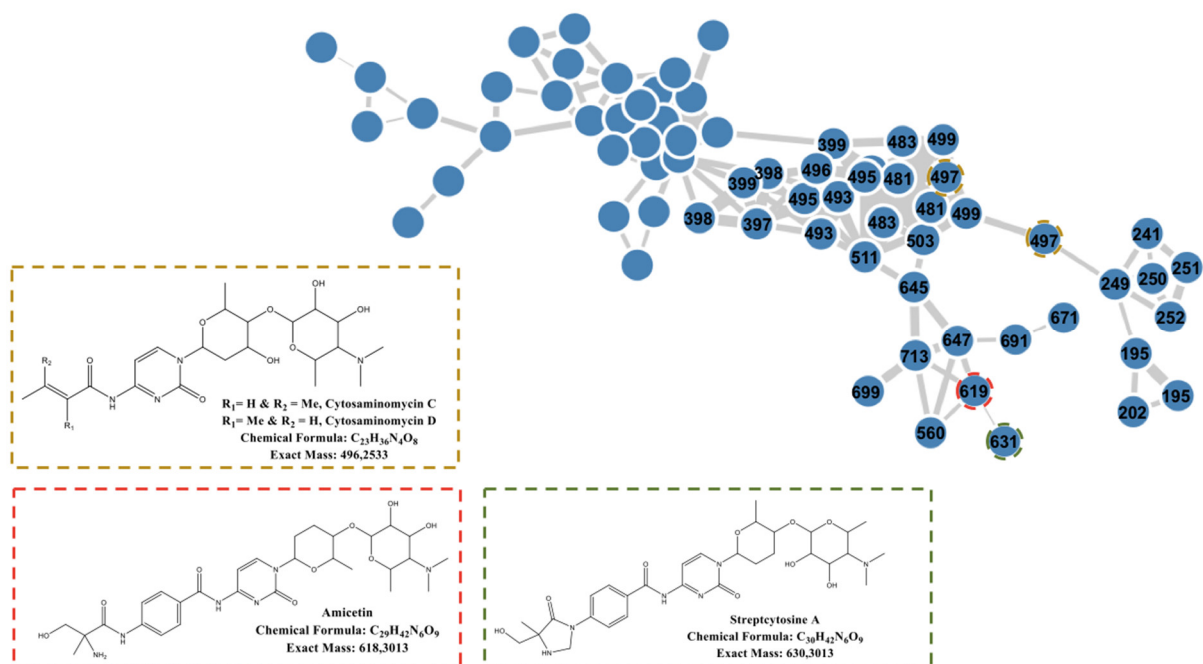

**Figure S27.** Ions cluster of amicetins and its related congeners from isolate SHP 22-7.

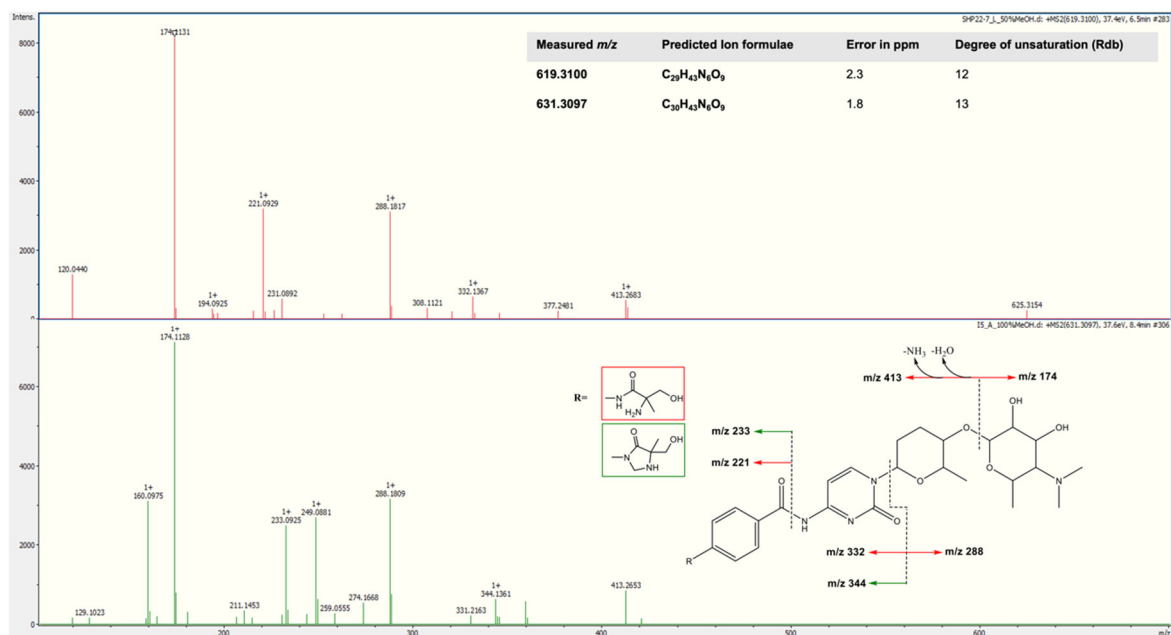

**Figure 28.** Comparative positive MS<sup>2</sup> of amicetin and streptocytosin A.

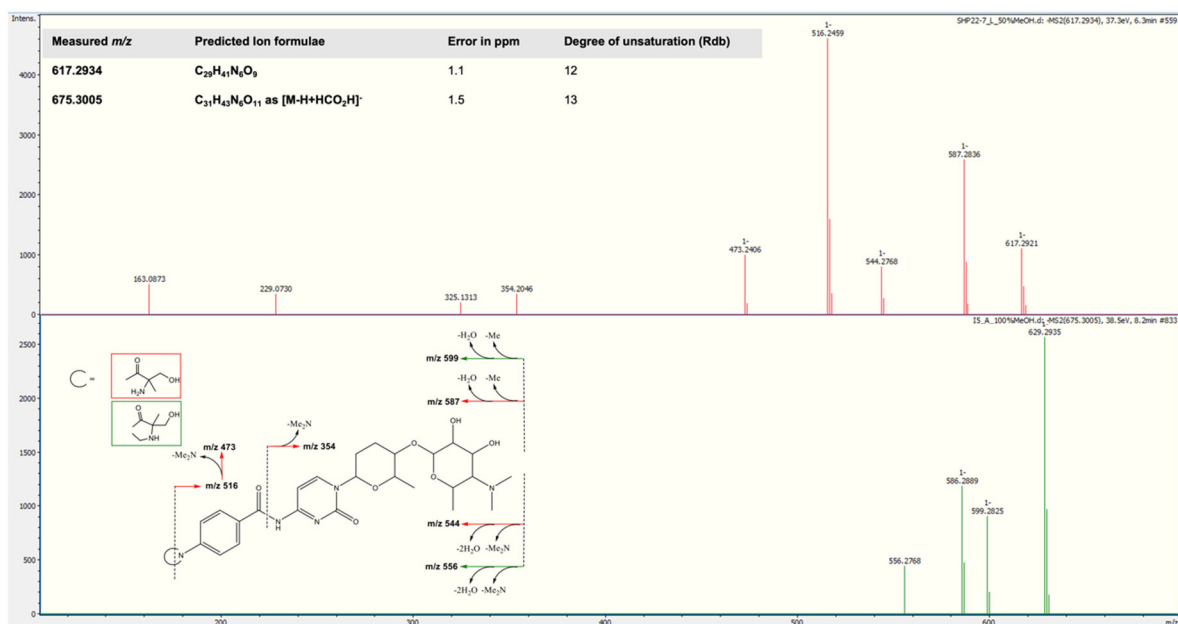

**Figure S29.** Comparative negative MS<sup>2</sup> of amicetin and streptocytosin A

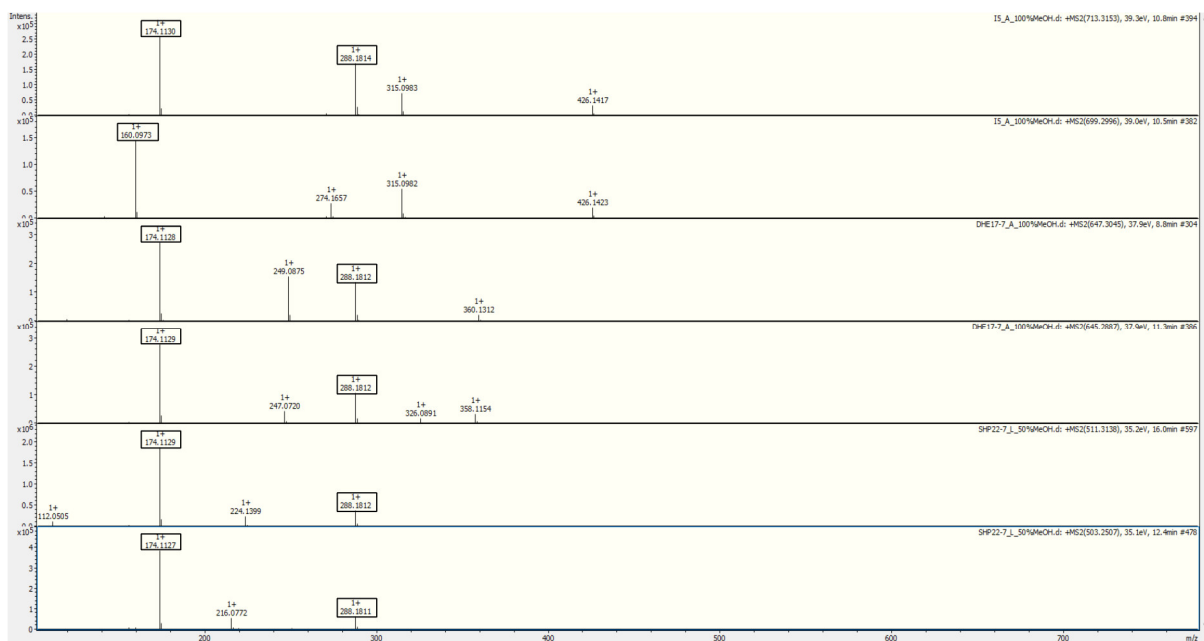

**Figure S30.** Comparative positive MS<sup>2</sup> of some unknown members of amicitin molecular family.

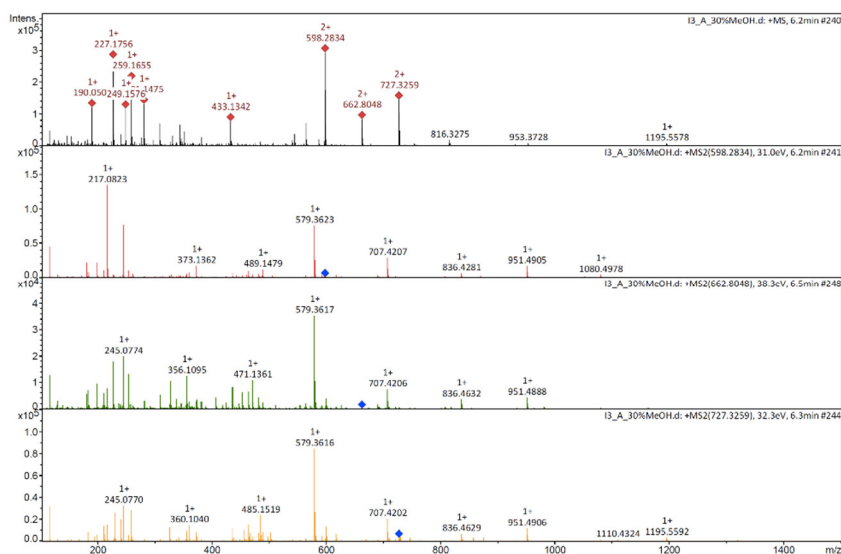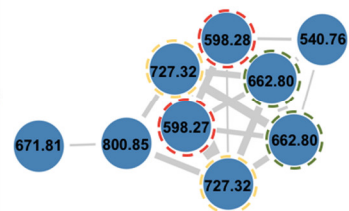

**Figure S31.** Comparative positive MS<sup>2</sup> of some unknowns of likely peptides.

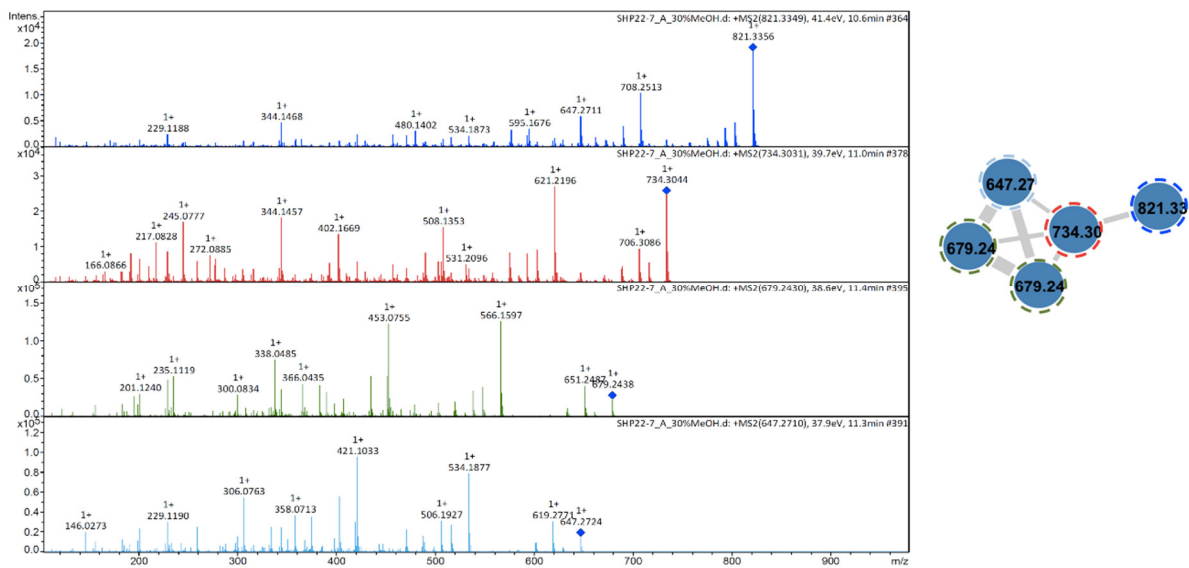

**Figure S32.** Comparative positive MS<sup>2</sup> of compound group I from isolate SHP 22-7.

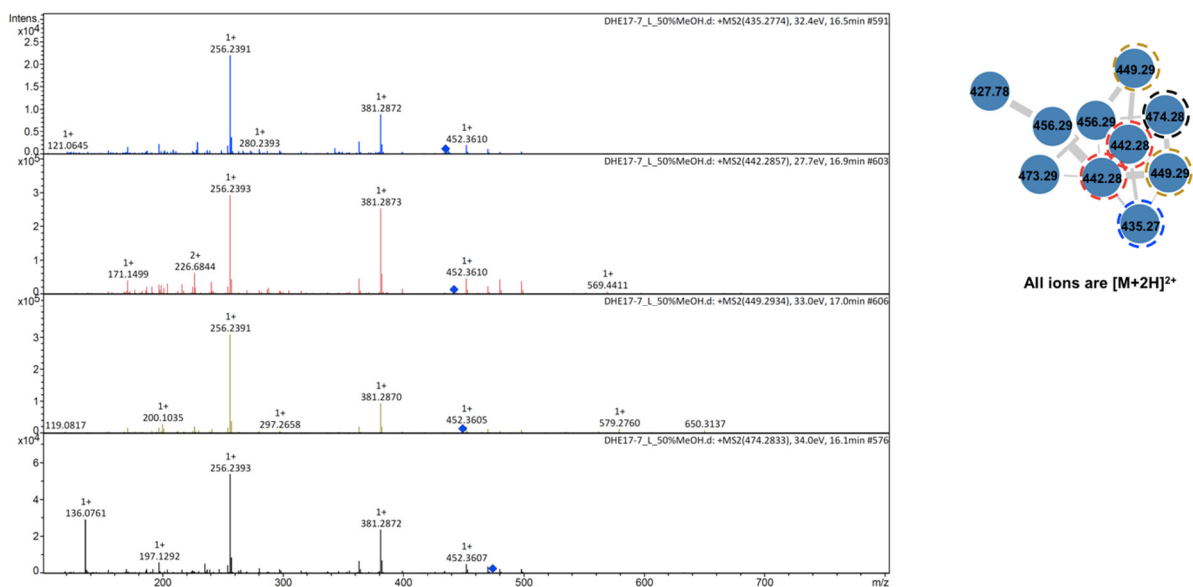

**Figure S33.** Comparative positive MS<sup>2</sup> of compound group II from isolate DHE 17-7

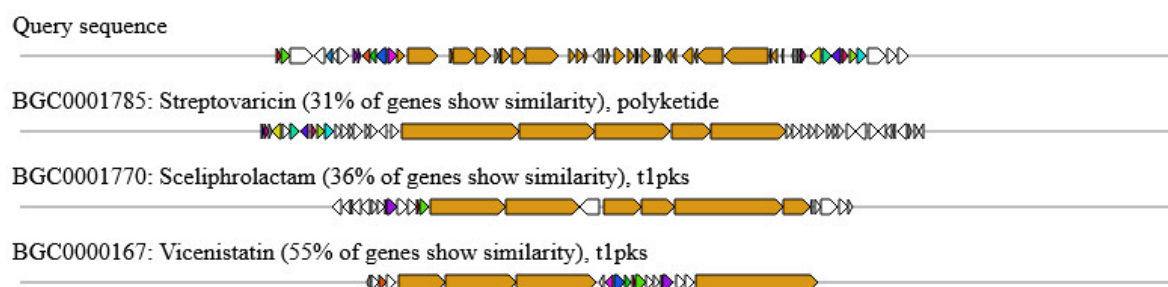

**Figure S34.** Cluster similarity between the DHE 17-7 gene region 24 (query sequence) and the streptovaricin, sceliphrolactam and vicenistatin cluster.

**Table S1.** Genome characteristics from nine Indonesian actinomycetes strain isolates.

| Strain   | Genome size (bp) | Contigs | GC content (%) | Coding sequence (CDS) | Transfer RNA (tRNA) | Ribosomal RNA (rRNA) |
|----------|------------------|---------|----------------|-----------------------|---------------------|----------------------|
| DHE 17-7 | 8,364,241        | 5       | 72.11          | 7,895                 | 83                  | 15                   |
| DHE 7-1  | 8,144,351        | 3       | 72.08          | 8,168                 | 90                  | 18                   |
| SHP 22-7 | 7,899,734        | 146     | 72.20          | 4,602                 | 63                  | 18                   |
| 14       | 7,712,674        | 7       | 72.26          | 6,877                 | 84                  | 18                   |
| I3       | 7,638,058        | 7       | 72.26          | 7,394                 | 83                  | 18                   |
| I5       | 7,611,235        | 4       | 72.27          | 6,842                 | 80                  | 18                   |
| BSE 7F   | 7,510,161        | 5       | 72.30          | 6,880                 | 79                  | 21                   |
| BSE 7-9  | 7,435,252        | 5       | 72.29          | 6,562                 | 82                  | 18                   |
| I6       | 7,054,598        | 2       | 72.47          | 6,005                 | 79                  | 18                   |

**Table S2. media tested for antibiotic production in agar and liquid culture.** All data refer to 1 l H<sub>2</sub>O<sub>deion.</sub>. For solid media 16 g/l agar is added, except for R5 medium 18 g/l agar is added.

| medium                     | Ingrediens                                                                                                                                                                                                                                                | pH                                                                                                                                                                                                        |
|----------------------------|-----------------------------------------------------------------------------------------------------------------------------------------------------------------------------------------------------------------------------------------------------------|-----------------------------------------------------------------------------------------------------------------------------------------------------------------------------------------------------------|
| NL410 (preculture medium)  | 10 g glucose<br>10 g glycerol<br>5 g oat meal<br>10 g soy flour<br>5 g yeast extract<br>5 g bacto casamino acids<br>1 g CaCO <sub>3</sub>                                                                                                                 | pH 7.0                                                                                                                                                                                                    |
| NL19 (main culture medium) | 20 g mannitol<br>20 g soy flour                                                                                                                                                                                                                           | pH 7.5                                                                                                                                                                                                    |
| SGG                        | 10 g soluble starch<br>10 g glucose<br>10 g glycerol<br>2.5 g corn steep powder<br>5 g bacto peptone<br>2 g yeast extract<br>1 g NaCl<br>3 g CaCO <sub>3</sub>                                                                                            | pH 7.3                                                                                                                                                                                                    |
| MS                         | 20 g mannitol<br>20 g soya flour, full fat                                                                                                                                                                                                                | -                                                                                                                                                                                                         |
| R5 medium                  | 103 g saccharose<br>10 g glucose<br>0,25 g K <sub>2</sub> SO <sub>4</sub><br>10,12 g MgCl <sub>2</sub><br>0,1 g casamino acids<br>5 g yeast extract<br>5,73 g TES<br>2 ml trace element solution<br>in 955 ml H <sub>2</sub> O <sub>deion.</sub> to solve | adjust pH before autoclaving<br>with NaOH to 7.2;<br>after autoclaving separate<br>addition of:<br>20 ml 1 M CaCl <sub>2</sub> ,<br>10 ml 0,54% KH <sub>2</sub> PO <sub>4</sub> ,<br>15 ml 20 % L-proline |
| Yeast Malt (YM)            | 10 g malt extract<br>5 g yeast extract<br>4 g glucose                                                                                                                                                                                                     | pH 7.3                                                                                                                                                                                                    |
| Oat meal medium (OM)       | 20 g oat meal<br>5 ml trace element solution                                                                                                                                                                                                              | pH 7.3                                                                                                                                                                                                    |
| TSG                        | 17 g bacto tryptone<br>3 g bacto soytone<br>2.5 g glucose<br>5 g NaCl<br>2.5 g K <sub>2</sub> HPO <sub>4</sub>                                                                                                                                            | set pH to 7.3 before<br>autoclaving                                                                                                                                                                       |



|       |                                                                                                                                                                   |                                                                               |
|-------|-------------------------------------------------------------------------------------------------------------------------------------------------------------------|-------------------------------------------------------------------------------|
| NL300 | 20 g mannitol<br>20 g cotton seed                                                                                                                                 | pH 7.5                                                                        |
| NL333 | 5 g glucose<br>10 g soluble starch<br>10 g malt extract<br>3 g yeast extract<br>3 g bacto peptone<br>3 g NH <sub>4</sub> NO <sub>3</sub><br>2 g CaCO <sub>3</sub> | pH 7.2                                                                        |
| NL500 | 10 g soluble starch<br>10 g glucose<br>10 g glycerol<br>15 g fish flour<br>10 g sea salt                                                                          | Adjust pH to 8.0, retitrate to pH 8.0 after 1 hour = pH 6.6 after autoclaving |
| NL550 | 10 g soluble starch<br>10 g glucose<br>5 g peptone from casein<br>2.5 g corn starch powder<br>2 g CaCO <sub>3</sub><br>10 g sea salt                              | Adjust pH to 8.0, retitrate to pH 8.0 after 1 hour = pH 6.6 after autoclaving |
| NL800 | 5 g glucose<br>10 g glycerol<br>10 g soluble starch<br>5 g soy flour, full fat<br>2 g yeast extract<br>1 g NaCl<br>1 g CaCO <sub>3</sub>                          | pH 7.2                                                                        |

**Table S3.** List of optimal culture conditions (media, time point) and bioactivity profile of nine Indonesian strain isolates.

| Strain   | Optimal production in liquid medium | Optimal production in solid medium | Optimal incubation time (h) in liquid | Antimicrobial activity against Gram (+)/(-) test bacteria |
|----------|-------------------------------------|------------------------------------|---------------------------------------|-----------------------------------------------------------|
| I6       | R5                                  | MS                                 | 48                                    | (+), (-)                                                  |
| DHE 7-1  | OM                                  | OM                                 | 48                                    | (+)                                                       |
| DHE 17-7 | SGG                                 | SGG                                | 48                                    | (+)                                                       |

|          |       |       |     |          |
|----------|-------|-------|-----|----------|
| I3       | NL550 | MS    | 72  | (+), (-) |
| 14       | NL550 | MS    | 72  | (+), (-) |
| I5       | MS    | MS    | 96  | (+), (-) |
| SHP 22-7 | NL300 | NL300 | 96  | (+), (-) |
| BSE 7-9  | NL19  | NL19  | 96  | (+), (-) |
| BSE 7F   | NL500 | NL500 | 168 | (+), (-) |

**Table S4.** List of predicted BGCs of strain DHE 17-7 derived from antiSMASH analysis. The minus sign (-) indicates the BGC did not have any similarity with any BGCs in the antiSMASH database.

| Region    | Type                            | Most similar known region                                     | Similarity |
|-----------|---------------------------------|---------------------------------------------------------------|------------|
| Region 1  | NRPS                            | streptothricin                                                | 87%        |
| Region 2  | NRPS, T1PKS, NRPS-like, hglE-KS | levorin A3 /C06690 / FR-008-III / candididin A /UNIAP5PEF5W7U | 95%        |
| Region 3  | terpene                         | lysolipin I                                                   | 4%         |
| Region 4  | indole                          | 5-isoprenylindole-3-carboxylate $\beta$ -Dglycosyl ester      | 33%        |
| Region 5  | terpene                         | carotenoid                                                    | 54%        |
| Region 6  | T3PKS                           | herboxidiene                                                  | 8%         |
| Region 7  | ectoine                         | ectoine                                                       | 100%       |
| Region 8  | melanin                         | melanin                                                       | 60%        |
| Region 9  | siderophore                     | desferrioxamine B/desferrioxamine E                           | 83%        |
| Region 10 | NRPS-like                       | -                                                             | -          |
| Region 11 | PKS-like, furan                 | methylenomycin A                                              | 9%         |
| Region 12 | lanthipeptide                   | catenulipectin                                                | 60%        |
| Region 13 | NRPS                            | phosphonoglycans                                              | 5%         |
| Region 14 | terpene                         | albaflavenone                                                 | 100%       |
| Region 15 | T2PKS                           | spore pigment                                                 | 66%        |
| Region 16 | siderophore                     | -                                                             | -          |
| Region 17 | bacteriocin                     | -                                                             | -          |
| Region 18 | terpene                         | geosmin                                                       | 100%       |
| Region 19 | siderophore                     | paulomycin                                                    | 7%         |
| Region 20 | NRPS                            | CDA1b / CDA2a /CDA2b/ CDA3a/ CDA3b / CDA4a /CDA4b             | 70%        |
| Region 21 | NRPS-like                       | amicetin                                                      | 79%        |
| Region 22 | lanthipeptide                   | -                                                             | -          |
| Region 23 | terpene                         | hopene                                                        | 100%       |
| Region 24 | T1PKS                           | streptovaricin                                                | 31%        |
| Region 25 | terpene                         | versipelostatin                                               | 5%         |
| Region 26 | bacteriocin                     | informatipeptin                                               | 42%        |

|           |                       |                 |      |
|-----------|-----------------------|-----------------|------|
| Region 27 | NRPS                  | coelichelin     | 100% |
| Region 28 | lanthipeptide         | -               | -    |
| Region 29 | lanthipeptide         | SapB            | 100% |
| Region 30 | T2PKS , butyrolactone | fluostatins M-Q | 62%  |

**Table S5.** List of predicted BGCs of strain SHP22-7 derived from antiSMASH analysis. The minus sign (-) indicates the BGC did not have any similarity with any BGCs in the antiSMASH database.

| Region    | Type                        | Most similar known region                                 | Similarity |
|-----------|-----------------------------|-----------------------------------------------------------|------------|
| Region 1  | terpene                     | albaflavenone                                             | 100%       |
| Region 2  | T2PKS                       | spore pigment                                             | 66%        |
| Region 3  | furan                       | methylenomycin                                            | 9%         |
| Region 4  | NRPS-like                   | granaticin                                                | 5%         |
| Region 5  | melanin                     | istamycin                                                 | 4%         |
| Region 6  | ectoine                     | ectoine                                                   | 100%       |
| Region 7  | NRPS                        | phosphonoglycans                                          | 5%         |
| Region 8  | bacteriocin                 | -                                                         | -          |
| Region 9  | terpene                     | geosmin                                                   | 100%       |
| Region 10 | NRPS-like                   | amicetin                                                  | 70%        |
| Region 11 | NRPS                        | CDA1a/CDA2a/CDA2b/CDA3a/CDA3b/CDA4a/CDA4b                 | 45%        |
| Region 12 | T3PKS                       | herboxidiene                                              | 8%         |
| Region 13 | siderophore                 | desferrioxamine B/desferrioxamine E                       | 100%       |
| Region 14 | indole                      | 5-isoprenylindole-3-carboxylate $\beta$ -D-glycosyl ester | 23%        |
| Region 15 | terpene                     | carotenoid                                                | 36%        |
| Region 16 | T2PKS butyrolactone<br>NRPS | fluostatins                                               | 62%        |
| Region 17 | terpene                     | hopene                                                    | 76%        |
| Region 18 | lanthipeptide               | -                                                         | -          |
| Region 19 | T1PKS NRPS                  | candicidin                                                | 90%        |
| Region 20 | NRPS arylpolyene            | lipopeptide 8D1-1/lipopeptide 8D-2                        | 29%        |
| Region 21 | siderophore                 | grincamycin                                               | 8%         |
| Region 22 | T1PKS                       | streptovaricin                                            | 26%        |
| Region 23 | hglE-KS                     | sanglifehrin                                              | 13%        |
| Region 24 | bacteriocin                 | informatipeptin                                           | 57%        |
| Region 25 | NRPS                        | coelichelin                                               | 27%        |

**Table S6.** List of predicted BGCs of strain I3 derived from antiSMASH analysis. The minus sign (-) indicates the BGC did not have any similarity with any BGCs in the antiSMASH database.

| Region    | Type                                       | Most similar known region           | Similarity |
|-----------|--------------------------------------------|-------------------------------------|------------|
| Region 1  | siderophore                                | grincamycin                         | 8%         |
| Region 2  | terpene                                    | geosmin                             | 100%       |
| Region 3  | bacteriocin                                | -                                   | -          |
| Region 4  | terpene                                    | albaflavenone                       | 100%       |
| Region 5  | lassopeptide                               | aborycin                            | 85%        |
| Region 6  | siderophore                                | desferrioxamine B/desferrioxamine E | 83%        |
| Region 7  | ectoine                                    | ectoine                             | 100%       |
| Region 8  | T2PKS                                      | spore pigment                       | 83%        |
| Region 9  | terpene                                    | carotenoid                          | 45%        |
| Region 10 | T3PKS                                      | alkylresorcinol                     | 100%       |
| Region 11 | NRPS, T1PKS, PKS-like                      | naphthyridinomycin                  | 100%       |
| Region 12 | terpene                                    | hopene                              | 84%        |
| Region 13 | PKS-like, T1PKS, hglE-KS                   | nataxazole                          | 55%        |
| Region 14 | bacteriocin                                | informatipeptin                     | 57%        |
| Region 15 | ectoine, NRPS, butyrolactone, other, T1PKS | polyoxypeptin                       | 48%        |
| Region 16 | amglyccycl                                 | cetoniacytone A                     | 12%        |
| Region 17 | TfuA-related                               | -                                   | -          |
| Region 18 | NRPS-like                                  | rhizomide A/rhizomide B/rhizomide C | 100%       |

**Table S7.** List of predicted BGCs of strain I4 derived from antiSMASH analysis. The minus sign (-) indicates the BGC did not have any similarity with any BGCs in the antiSMASH database.

| Region    | Type          | Most similar known region           | Similarity |
|-----------|---------------|-------------------------------------|------------|
| Region 1  | terpene       | hopene                              | 92%        |
| Region 2  | siderophore   | grincamycin                         | 8%         |
| Region 3  | terpene       | geosmin                             | 100%       |
| Region 4  | bacteriocin   | -                                   | -          |
| Region 5  | terpene       | albaflavenone                       | 100%       |
| Region 6  | lassopeptide  | aborycin                            | 100%       |
| Region 7  | lanthipeptide | venezuelin                          | 100%       |
| Region 8  | siderophore   | desferrioxamine B/desferrioxamine E | 83%        |
| Region 9  | T2PKS         | spore pigment                       | 83%        |
| Region 10 | ectoine       | ectoine                             | 100%       |
| Region 11 | NRPS          | SCO-2138                            | 64%        |
| Region 12 | TfuA-related  | -                                   | -          |
| Region 13 | lanthipeptide | SapB                                | 100%       |
| Region 14 | amglyccycl    | -                                   | -          |

|           |                                                                     |                    |      |
|-----------|---------------------------------------------------------------------|--------------------|------|
| Region 15 | NRPS, T1PKS, other, butyrolactone, ectoine, lanthipeptide, PKS-like | naphthyridinomycin | 100% |
| Region 16 | T3PKS                                                               | alkylresorcinol    | 100% |
| Region 17 | terpene                                                             | carotenoid         | 54%  |
| Region 18 | hglE-KS, T1PKS, PKS-like                                            | nataxazole         | 48%  |
| Region 19 | bacteriocin                                                         | informatipeptin    | 57%  |
| Region 20 | ectoine                                                             | ectoine            | 100% |

**Table S8.** List of predicted BGCs of strain I5 derived from antiSMASH analysis. The minus sign (-) indicates the BGC did not have any similarity with any BGCs in the antiSMASH database.

| Region    | Type                                       | Most similar known region           | Similarity |
|-----------|--------------------------------------------|-------------------------------------|------------|
| Region 1  | T3PKS                                      | alkylresorcinol                     | 100%       |
| Region 2  | terpene                                    | carotenoid                          | 54%        |
| Region 3  | T2PKS                                      | spore pigment                       | 83%        |
| Region 4  | ectoine                                    | ectoine                             | 100%       |
| Region 5  | NRPS                                       | SCO-2138                            | 64%        |
| Region 6  | siderophore                                | desferrioxamine B/desferrioxamine E | 83%        |
| Region 7  | lanthipeptide                              | venezuelin                          | 100%       |
| Region 8  | lassopeptide                               | aborycin                            | 100%       |
| Region 9  | terpene                                    | albaflavenone                       | 100%       |
| Region 10 | bacteriocin                                | -                                   | -          |
| Region 11 | terpene                                    | geosmin                             | 100%       |
| Region 12 | siderophore                                | grincamycin                         | 11%        |
| Region 13 | T2PKS                                      | resistomycin / resistoflavine       | 88%        |
| Region 14 | terpene                                    | hopene                              | 92%        |
| Region 15 | bacteriocin                                | informatipeptin                     | 42%        |
| Region 16 | NRPS, ectoine, butyrolactone, other, T1PKS | aurantimycin A                      | 51%        |
| Region 17 | NRPS, T1PKS, PKS-like                      | naphthyridinomycin                  | 57%        |
| Region 18 | NRPS                                       | naphthyridinomycin                  | 39%        |
| Region 19 | ectoine                                    | ectoine                             | 100%       |

**Table S9.** List of predicted BGCs of strain BSE 7F derived from antiSMASH analysis. The minus sign (-) indicates the BGC did not have any similarity with any BGCs in the antiSMASH database

| Region    | Type                                       | Most similar known region           | Similarity |
|-----------|--------------------------------------------|-------------------------------------|------------|
| Region 1  | ectoine                                    | ectoine                             | 100%       |
| Region 2  | NRPS                                       | SCO-2138                            | 64%        |
| Region 3  | siderophore                                | desferrioxamine B/desferrioxamine E | 83%        |
| Region 4  | lanthipeptide                              | venezuelin                          | 100%       |
| Region 5  | lassopeptide                               | aborycin                            | 100%       |
| Region 6  | phenazine                                  | -                                   | -          |
| Region 7  | terpene                                    | albaflavenone                       | 100%       |
| Region 8  | bacteriocin                                | -                                   | -          |
| Region 9  | terpene                                    | geosmin                             | 100%       |
| Region 10 | siderophore                                | grincamycin                         | 11%        |
| Region 11 | T2PKS                                      | resistomycin /resistoflavine        | 88%        |
| Region 12 | terpene                                    | hopene                              | 92%        |
| Region 13 | transAT-PKS                                | weishanmycin                        | 54%        |
| Region 14 | NRPS                                       | weishanmycin                        | 41%        |
| Region 15 | bacteriocin                                | informatipeptin                     | 57%        |
| Region 16 | NRPS, ectoine, butyrolactone, other, T1PKS | aurantimycin A                      | 51%        |
| Region 17 | terpene, amglyccycl                        | cetoniacytone A                     | 12%        |
| Region 18 | T2PKS                                      | spore pigment                       | 83%        |
| Region 19 | terpene                                    | carotenoid                          | 45%        |
| Region 20 | T3PKS                                      | alkylresorcinol                     | 100%       |
| Region 21 | NRPS, T1PKS                                | antimycin                           | 25%        |
| Region 22 | butyrolactone, ectoine                     | ectoine                             | 100%       |
| Region 23 | NRPS, PKS-like                             | naphthyridinomycin                  | 100%       |

**Table S10.** List of predicted BGCs of strain BSE 7-9 derived from antiSMASH analysis. The minus sign (-) indicates the BGC did not have any similarity with any BGCs in the antiSMASH database

| Region    | Type                   | Most similar known region           | Similarity |
|-----------|------------------------|-------------------------------------|------------|
| Region 1  | butyrolactone, ectoine | ectoine                             | 100%       |
| Region 2  | bacteriocin            | informatipeptin                     | 57%        |
| Region 3  | NRPS                   | weishanmycin                        | 38%        |
| Region 4  | transAT-PKS            | weishanmycin                        | 58%        |
| Region 5  | terpene                | hopene                              | 92%        |
| Region 6  | T2PKS                  | resistomycin/resistoflavine         | 88%        |
| Region 7  | siderophore            | grincamycin                         | 11%        |
| Region 8  | terpene                | geosmin                             | 100%       |
| Region 9  | bacteriocin            | -                                   | -          |
| Region 10 | terpene                | albaflavenone                       | 100%       |
| Region 11 | phenazine              | -                                   | -          |
| Region 12 | lassopeptide           | aborycin                            | 100%       |
| Region 13 | lanthipeptide          | venezuelin                          | 100%       |
| Region 14 | siderophore            | desferrioxamine B/desferrioxamine E | 83%        |
| Region 15 | NRPS                   | SCO-2138                            | 64%        |
| Region 16 | ectoine                | ectoine                             | 100%       |
| Region 17 | T2PKS                  | spore pigment                       | 83%        |
| Region 18 | terpene                | carotenoid                          | 54%        |
| Region 19 | T3PKS                  | alkylresorcinol                     | 100%       |
| Region 20 | NRPS, T1PKS, PKS-like  | naphthyridinomycin                  | 100%       |
| Region 21 | ectoine, butyrolactone | ectoine                             | 100%       |
| Region 22 | NRPS, T1PKS            | polyoxyypeptin                      | 32%        |

**Table S11.** List of predicted BGCs of strain DHE 7-1 derived from antiSMASH analysis. The minus sign (-) indicates the BGC did not have any similarity with any BGCs in the antiSMASH database.

| Region    | Type                    | Most similar known region | Similarity |
|-----------|-------------------------|---------------------------|------------|
| Region 1  | lanthipeptide           | actinorhodin              | 9%         |
| Region 2  | terpene                 | pentalenolactone          | 58%        |
| Region 3  | NRPS, lanthipeptide     | vioprolide A              | 33%        |
| Region 4  | melanin                 | melanin                   | 57%        |
| Region 5  | T1PKS                   | foxicins A-D              | 12%        |
| Region 6  | lassopeptide, terpene   | isorenieratene            | 63%        |
| Region 7  | T3PKS                   | herboxidiene              | 7%         |
| Region 8  | PKS-like, butyrolactone | -                         | -          |
| Region 9  | ectoine                 | ectoine                   | 100%       |
| Region 10 | melanin                 | istamycin                 | 4%         |

|           |                                                       |                                                      |      |
|-----------|-------------------------------------------------------|------------------------------------------------------|------|
| Region 11 | siderophore                                           | desferrioxamine                                      | 66%  |
| Region 12 | T2PKS, bacteriocin                                    | spore pigment                                        | 83%  |
| Region 13 | NRPS                                                  | peptidinnamin E                                      | 20%  |
| Region 14 | terpene                                               | julichrome Q3-3 /julichrome Q3-5                     | 14%  |
| Region 15 | siderophore                                           | -                                                    | -    |
| Region 16 | transAT-PKS-like,<br>NRPS, transATPKS,<br>bacteriocin | phthoxazolin                                         | 20%  |
| Region 17 | other, T1PKS, PKS-like                                | meilingmycin                                         | 6%   |
| Region 18 | bacteriocin                                           | -                                                    | -    |
| Region 19 | terpene                                               | geosmin                                              | 100% |
| Region 20 | siderophore                                           | -                                                    | -    |
| Region 21 | NRPS, T1PKS                                           | polyoxypeptin                                        | 21%  |
| Region 22 | terpene                                               | hopene                                               | 84%  |
| Region 23 | NRPS, T1PKS                                           | conglobatin                                          | 26%  |
| Region 24 | NRPS, bacteriocin                                     | surugamide A/ surugamide D                           | 19%  |
| Region 25 | NRPS                                                  | stenothricin                                         | 18%  |
| Region 26 | other, T3PKS                                          | A-503083 A / A-503083 B /<br>A-503083 E / A-503083 F | 9%   |
| Region 27 | NRPS                                                  | lipopeptide 8D1-1 / lipopeptide 8D1-2                | 13%  |

**Table S12.** List of predicted BGCs of strain I6 derived from antiSMASH analysis. The minus sign (-) indicates the BGC did not have any similarity with any BGCs in the antiSMASH database.

| Region    | Type               | Most similar known region           | Similarity |
|-----------|--------------------|-------------------------------------|------------|
| Region 1  | indole             | staurosporine                       | 100%       |
| Region 2  | NRPS               | scabichelin                         | 100%       |
| Region 3  | NRPS-like, terpene | stenothricin                        | 13%        |
| Region 4  | T2PKS, siderophore | spore pigment                       | 75%        |
| Region 5  | siderophore        | desferrioxamine B/desferrioxamine E | 83%        |
| Region 6  | thiopeptide, LAP   | -                                   | -          |
| Region 7  | phosphonate, NRPS  | phosphonoacetic                     | 15%        |
| Region 8  | NRPS-like          | phosphonoglycans                    | 3%         |
| Region 9  | NRPS-like          | stenothricin                        | 13%        |
| Region 10 | siderophore        | ficellomycin                        | 3%         |
| Region 11 | NRPS               | echinomycin                         | 88%        |
| Region 12 | bacteriocin        | -                                   | -          |
| Region 13 | T3PKS              | flaviolin                           | 75%        |
| Region 14 | terpene            | isorenieratene                      | 100%       |
| Region 15 | linaridin          | nogalamycin                         | 30%        |
| Region 16 | bacteriocin        | -                                   | -          |
| Region 17 | terpene            | hopene                              | 61%        |
| Region 18 | NRPS, T1PKS        | tirandamycin                        | 100%       |
| Region 19 | melanin            | melanin                             | 28%        |
| Region 20 | thiopeptide, LAP   | -                                   | -          |



|           |                               |                  |      |
|-----------|-------------------------------|------------------|------|
| Region 21 | T1PKS, hglE-KS, lanthipeptide | SapB             | 100% |
| Region 22 | T3PKS, fused                  | pheganomycin     | 52%  |
| Region 23 | NRPS-like                     | streptonigrin    | 5%   |
| Region 24 | NRPS, T1PKS, butyrolactone    | neocarzinostatin | 50%  |

**Table S13.** Parameters used in MetaboScape analysis.

| Parameter name                                | Value                                                                                                                                                   |
|-----------------------------------------------|---------------------------------------------------------------------------------------------------------------------------------------------------------|
| Intensity threshold [counts]                  | 1000.0                                                                                                                                                  |
| Minimum peak length [spectra]                 | 3                                                                                                                                                       |
| Minimum peak length (recursive) [spectra]     | 1                                                                                                                                                       |
| Minimum # Features for Extraction             | 1                                                                                                                                                       |
| Presence of features in minimum # of analyses | 1                                                                                                                                                       |
| Lock mass calibration                         | false                                                                                                                                                   |
| Mass calibration                              | false                                                                                                                                                   |
| Excl. mass list                               | [666.019887, 413.0, 352.0]                                                                                                                              |
| Excl. mass tolerance                          | 5.0                                                                                                                                                     |
| Excl. mass tolerance unit                     | mDa                                                                                                                                                     |
| Primary Ion                                   | [M+H] <sup>+</sup>                                                                                                                                      |
| Seed Ions                                     | [M+Na] <sup>+</sup> , [M+K] <sup>+</sup> , [2M+H] <sup>+</sup> , [2M+Na] <sup>+</sup> , [M+2H] <sup>2+</sup> , [M+H+Na] <sup>2+</sup>                   |
| Common Ions                                   | [M-H <sub>2</sub> O+H] <sup>+</sup> , [M+H <sub>2</sub> O+H] <sup>+</sup> , [2M+H <sub>2</sub> O+H] <sup>+</sup> , [2M-H <sub>2</sub> O+H] <sup>+</sup> |
| EIC correlation                               | 0.8                                                                                                                                                     |
| Mass range: Start [m/z]                       | 150.0                                                                                                                                                   |
| Mass range: End [m/z]                         | 1800.0                                                                                                                                                  |
| Retention time range: Start [min]             | 1.0                                                                                                                                                     |
| Retention time range: End [min]               | 48.0                                                                                                                                                    |
| Perform MS/MS import                          | true                                                                                                                                                    |
| Group by collision energy                     | true                                                                                                                                                    |
| MS/MS import method                           | average                                                                                                                                                 |

#### References:

1. Luo, X.X.; Kai, L.; Wang, Y.; Wan, C.X.; Zhang, L.L. *Streptomyces luteus* sp. nov., an actinomycete isolated from soil. *Int. J. Syst. Evol. Microbiol.* **2017**, *67*, 543–547, doi:10.1099/ijsem.0.001611.
2. Mertz, F.P.; Higgins, C.E. *Streptomyces capillispiralis* sp. nov. *Int. J. Syst. Bacteriol.* **1982**, *32*, 116–124, doi:10.1099/00207713-32-1-116.
3. Eguchi, T.; Takada, N.; Nakamura, S.; Tanaka, T.; Makino, T.; Oshima, Y. *Streptomyces bungoensis* sp. nov. *Int. J. Syst. Bacteriol.* **1993**, doi:10.1099/00207713-43-4-794.
4. Huang, X.; Zhou, S.; Huang, D.; Chen, J.; Zhu, W. *Streptomyces spongiicola* sp. Nov., An actinomycete derived from marine sponge. *Int. J. Syst. Evol. Microbiol.* **2016**, *66*, 738–743, doi:10.1099/ijsem.0.000782.
